# Supplementary material for: HPV DNA Integration at Actionable Cancer-Related Genes Loci in HPV-Associated Carcinomas
Source: Cancers (Basel). 2024 Apr 20;16(8):1584. doi: 10.3390/cancers16081584 (PMC11048798; doi:10.3390/cancers16081584)
Supplement: Supplementary file 1 [file cancers-16-01584-s001.zip]

Archive with 4 entries (4 files):
- File SF1 HPV inserts per tumor.xls
- File SF2 All Data.xls
- File SF3 Recurrent targets per HPV & locasization.xlsx
- Supplementary Tables S1-S4pdf.pdf
