# Supplementary material for: HPV DNA Integration at Actionable Cancer-Related Genes Loci in HPV-Associated Carcinomas
Source: Cancers (Basel). 2024 Apr 20;16(8):1584. doi: 10.3390/cancers16081584 (PMC11048798; doi:10.3390/cancers16081584)
Supplement: Supplementary file 1 [file cancers-16-01584-s001.zip › File SF1 HPV inserts per tumor.xls]

## Sheet: Feuil1
1	13.2142	13q14.2	16	cancer	Cervix	1	Holmes	2016	NGM	NGS	NUDT15	RB1	MED4	ITM2B	LPAR6	SUCLA2
2	23.1222	Xp22.2	16	cancer	Cervix	2	Holmes	2016	NGM	NGS	OFD1	RAB9A	EGFL6	GMP6B
3	1.244	1q44	18	cancer	Cervix	3	Holmes	2016	NGM	NGS	AKT3	ZBTB18	C1ORF100
4	15.2223	15q22.31	18	cancer	Cervix	4	Holmes	2016	NGM	NGS	RAB11A
5	4.2213	4q21.3	16	cancer	Cervix	5	Holmes	2016	NGM	NGS	MAPK10	PTPN13	ARHGAP24	AFF
6	12.2242	12q24.22	51	cancer	Cervix	6	Holmes	2016	NGM	NGS	MED13L	RNFT2
7	20.2112	20q11.22	16	cancer	Cervix	7	Holmes	2016	NGM	NGS	ZNF341	PXMP4	NECAB3
8	19.2133	19q13.33	33	cancer	Cervix	8	Holmes	2016	NGM	NGS	RPL13A	FLT3LG
9	2.2112	2q11.2	45	cancer	Cervix	9	Holmes	2016	NGM	NGS	AFF3	REV1
10	13.2221	13q22.1	18	cancer	Cervix	10	Holmes	2016	NGM	NGS	KLF5	KLF12	PIBF1
11	3.228	3q28	16	SCC	Vulve	10	Thomas	2019	JLGTD	NGS	TP63	189790896
12	6.221	6q21	18	cancer	Cervix	11	Holmes	2016	NGM	NGS
13	8.22421	8q24.21	18	cancer	Cervix	12	Holmes	2016	NGM	NGS	MYC	CCAT1-CCAT2-PNCR1	128,198,367	128,315,709	POU5F1B
14	13.2221	13q22.1	18	cancer	Cervix	13	Holmes	2016	NGM	NGS	KLF5	KLF12	PIBF1
15	2.224	2q24	16	SCC	Vulve	14	Thomas	2019	JLGTD	NGS	CCDC148
16	4.2133	4q13.3	18	cancer	Cervix	14	Holmes	2016	NGM	NGS	IL8	CXL6	PF4V1	CXCL1	RASSF6	PF4
17	12.2222	12q22.2	18	cancer	Cervix	15	Holmes	2016	NGM	NGS	MMP12	MMP3
18	14.2241	14q24.1	18	cancer	Cervix	16	Peter	2010	J Pathol	DIPS	RAD51B		na
19	2.2223	2q22.3	73	cancer	Cervix	16	Holmes	2016	NGM	NGS		ZEB2
20	4.1162	4p16.2	18	cancer	Cervix	17	Holmes	2016	NGM	NGS	CPZ	GPR78	TRMT44	ACOX3	HMX1
21	7.2311	7q31.1	73	cancer	Cervix	18	Holmes	2016	NGM	NGS	IMMP2L
22	7.1211	7p21.1	18	cancer	Cervix	19	Holmes	2016	NGM	NGS	AHR
23	14.2323	14q32.31	18	cancer	Cervix	20	Holmes	2016	NGM	NGS	WDR20
24	4.11533	4p15.33	18	cancer	Cervix	21	Holmes	2016	NGM	NGS	HS3ST1
25	2.2223	2q22.3	16	cancer	Cervix	23	Holmes	2016	NGM	NGS	ZEB2
26	2.2273	3q27.3	31	cancer	Cervix	24	Holmes	2016	NGM	NGS	SST	RTP2	BCL6	LPP
27	5.235	5q35	16	cancer	Cervix	24	Tholand	2003	Oncogene	RS-PCR
28	17.2231	17q23.1	16	cancer	Cervix	25	Holmes	2016	NGM	NGS	VMP1
29	9.1112	9p11.2	16	cancer	Cervix	26	Holmes	2016	NGM	NGS	LOC100132167
30	7.1123	7p12.3	18	cancer	Cervix	27	Holmes	2016	NGM	NGS
31	5.2132	5q13.2	16	cancer	Cervix	28	Holmes	2016	NGM	NGS	MAST4
32	1.2321	1q32.1	16	SCC	Vulva	28	Thomas	2019	JLGTD	NGS	PKP1
33	3.229	3q29	16	cancer	Cervix	29	Holmes	2016	NGM	NGS	HES1
	8.22421	8q24.21	16	cancer	Cervix	29	Holmes	2016	NGM	NGS	MYC		128,676,026	128,760,118
34	20.2133	20q13.32	31	cancer	Cervix	30	Holmes	2016	NGM	NGS	RAB22A
	23.212	Xq12	31	cancer	Cervix	30	Holmes	2016	NGM	NGS	YIPF6
35	9.22232	9q22.32	16	cancer	Cervix	31	Holmes	2016	NGM	NGS	C9orf3
	6.22232	6q22.32	16	cancer	Cervix	31	Holmes	2016	NGM	NGS	CENPW
	20.1121	20p12.1	16	cancer	Cervix	31	Holmes	2016	NGM	NGS	MACROD2
	2.2339	2q33.3	16	cancer	Cervix	31	Holmes	2016	NGM	NGS	PARD3B
	13.2221	13q22.1	16	cancer	Cervix	31	Holmes	2016	NGM	NGS		KLF12	PIBF1
36	15.212	15q12	16	cancer	Cervix	32	Holmes	2016	NGM	NGS	ATP10A
	13.2213	13q21.33	16	cancer	Cervix	32	Holmes	2016	NGM	NGS	DACH1
	8.22423	8q24.23	16	cancer	Cervix	32	Holmes	2016	NGM	NGS	FAM135B
	1.1311	1p31.1	16	cancer	Cervix	32	Holmes	2016	NGM	NGS	NEGRI	ZRANB2	PTGER3
	1.2311	1q31.1	16	cancer	Cervix	32	Holmes	2016	NGM	NGS	NEGRI
	15.2211	15q21.1	16	cancer	Cervix	32	Holmes	2016	NGM	NGS	SPG11	SORD
	2.115	2p15	16	cancer	Cervix	32	Holmes	2016	NGM	NGS	UGP2	MDH1	VPS54
37	1.2423	1q42.3	16	cancer	Cervix	33	Holmes	2016	NGM	NGS	GPR137B	NID1	ERO1LB	LYST	EDARADD
	20.2112	20q11.21	16	cancer	Cervix	33	Holmes	2016	NGM	NGS	HM13	IDI1	COX412	BCL2L1
38	2.2363	2q36.3	16	cancer	Cervix	34	Holmes	2016	NGM	NGS	COL4A4
	7.21123	7q11.23	16	cancer	Cervix	34	Holmes	2016	NGM	NGS	GATSL1	GATSL2
	2.234	2q34	16	cancer	Cervix	34	Holmes	2016	NGM	NGS	MAP2
	8.2231	8q23.1	16	cancer	Cervix	34	Holmes	2016	NGM	NGS	ZFPM2	OXR1
39	2.224	2q24	16	SCC	Vulve	35	Thomas	2019	JLGTD	NGS	CCDC148
40	11.2131	11q13.1	16	SCC	Vulve	50	Thomas	2019	JLGTD	NGS	POLA2
41	7.2323	7q32.3	16	SCC	Vulve	51	Thomas	2019	JLGTD	NGS	MKLN1
42	8.2213	8q21.3	16	cancer	Cervix	61	Thorland	2003	Oncogene	RS-PCR
43	12.213	12q13	16	cancer	Cervix	73	Thorland	2003	Oncogene	RS-PCR
44	10.222	10q22	16	cancer	Cervix	75	Thorland	2003	Oncogene	RS-PCR
45	13.2222	13q22.2	16	cancer	Cervix	80	Thorland	2003	Oncogene	RS-PCR
46	17.2231	17q23.1	18	cancer	Cervix	82	Holmes	2016	NGM	NGS	TUBD1
47	13.2222	13q22.2	16	cancer	Cervix	84	Thorland	2003	Oncogene	RS-PCR
48	5.2311	5q31.1	16	cancer	Cervix	86	Thorland	2003	Oncogene	RS-PCR
49	18.2213	18q21.33	16	cancer	Cervix	87	Holmes	2016	NGM	NGS	RNF152	PIGN
50	15.215	15q15	16	cancer	Cervix	91	Thorland	2003	Oncogene	RS-PCR
51	9.1241	9p24.1	16	cancer	Cervix	94	Thorland	2003	Oncogene	RS-PCR
52	1.241	1q41	16	cancer	Cervix	102	Thorland	2003	Oncogene	RS-PCR
53	17.2232	17q23.2	16	cancer	Cervix	107	Thorland	2003	Oncogene	RS-PCR
54	19.1132	19p13.2	16	cancer	Cervix	115	Holmes	2016	NGM	NGS	NFIX (0)
55	8.22421	8q24.21	18	cancer	Cervix	116	Holmes	2016	NGM	NGS		CCAT1			POUF51B
56	3.228	3q28	16	SCC	H&N	117	Khoury	2013	J Virol	NGS	TP63	189226255
57	9.22113	9q21.13	18	cancer	Cervix	125	Holmes	2016	NGM	NGS	ALDH1A1	ANXA1
58	1.13622	1p36.22	45	cancer	Cervix	126	Holmes	2016	NGM	NGS	DHRS3
59	3.228	3q28	16	cancer	Cervix	139	Holmes	2016	NGM	NGS	TPRG1
60	19.2134	19q13.42	68	cancer	Cervix	142	Holmes	2016	NGM	NGS	EPN1	meme cas ?
	15.223	15q23	16	cancer	Cervix	142	Holmes	2016	NGM	NGS	TLE3	UACA
61	3.228	3q28	18	cancer	Cervix	143	Holmes	2016	NGM	NGS	TP63	189620030	LEPREL1
62	9.23411	9q34.11	16	cancer	Cervix	144	Holmes	2016	NGM	NGS	NTMT1	C9orf50
63	6.221	6q21	16	cancer	Cervix	191	Thorland	2003	Oncogene	RS-PCR
64	23.1222	Xp22.2	16	cancer	Cervix	201	Holmes	2016	NGM	NGS	ATXN3L		EGFL6
	7.22111	7q21.11	16	cancer	Cervix	201	Holmes	2016	NGM	NGS	MAGI2
65	1.2322	1q32.2	16	cancer	Cervix	203	Holmes	2016	NGM	NGS	LAMB3	HSP11B1
	8.22423	8q24.23	16	cancer	Cervix	203	Holmes	2016	NGM	NGS
66	4.114	4p14	16	cancer	Cervix	205	Holmes	2016	NGM	NGS	TBC1D1
67	17.2232	17q23.2	16	cancer	Cervix	207	Thorland	2003	Oncogene	RS-PCR
68	6.1212	6p21.2	68	cancer	Cervix	208	Holmes	2016	NGM	NGS	TBC1D22B
69	14.2232	14q23.2	16	cancer	Cervix	254	Klimov	2002	BMC Cancer	APOT
70	4.1161	4p16.1	16	cancer	Cervix	259	Klimov	2002	BMC Cancer	APOT
71	20.1121	20p12.1	16	cancer	Cervix	265	Thorland	2003	Oncogene	RS-PCR
72	23.111	Xp11.3	16	cancer	Cervix	290	Klimov	2002	BMC Cancer	APOT
73	9.2343	9q34.3	16	cancer	Cervix	317	Thorland	2003	Oncogene	RS-PCR
74	12.2231	12q23.1	16	cancer	Cervix	327	Thorland	2003	Oncogene	RS-PCR
75	5.235	5q35.3	16	cancer	Cervix	407	Klimov	2002	BMC Cancer	APOT
76	2.222	2q22.1	16	cancer	Cervix	421	Klimov	2002	BMC cancer	APOT
77	2.232	2q32.3	16	cancer	Cervix	423	Klimov	2002	BMC Cancer	APOT
78	13.221	13q21-23	16	cancer	Cervix	431	Klimov	2002	BMC Cancer	APOT
79	3.2223	3q22.3	16	cancer	Cervix	466	Klimov	2002	BMC Cancer	APOT
80	6.221	6q21	16	cancer	Cervix	475	Klimov	2002	BMC Cancer	APOT
81	7.221	7q21.11	16	cancer	Cervix	477	Klimov	2002	BMC Cancer	APOT
82	10.223	10q23-32	16	cancer	Cervix	505	Klimov	2002	BMC Cancer	APOT
83	3.228	3q28	16	SCC	H&N	578	Khoury	2013	J Virol	NGS	TP63	189239853
84	13.2131	13q21.31	16	cancer	H&N	595	Mainguené	2022	Mol Oncol	NGS	LIN00376
85	17.1112	17p11.2	16	cancer	H&N	732	Walline	2016	Mol Cancer Res	DIPS	TNFRSF13B
86	2.2243	2q24.3	16	cancer	H&N	843	Walline	2016	Mol Cancer Res	DIPS	SCN2A
87	16.1112	16p11.2	16	cancer	H&N	1040	Walline	2016	Mol Cancer Res	DIPS	SH2B1
88	3.228	3q28	16	cancer	H&N	1971	Walline	2016	Mol Cancer Res	DIPS	TP63	Exon 4
89	14.2241	14q24.1	16	cancer	H&N	2049	Walline	2016	Mol Cancer Res	DIPS	SMOC1
	8.211	8q11	16	cancer	H&N	2049	Walline	2016	Mol Cancer Res	DIPS	UBEV2
90	1.1313	1p31.3	16	cancer	H&N	2238	Walline	2016	Mol Cancer Res	DIPS	NFIA
	15.2211	15q21.1	16	cancer	H&N	2238	Walline	2016	Mol Cancer Res	DIPS	SEMA6D
91	17.223	17q23	16	CIN2	Cervix	2002299	Matovina	2009	Gynecologic Oncology	DIPS	VMP1
92	1.2322	1q32.2	16	CIN2	Cervix	2002458	Matovina	2009	Gynecologic Oncology	DIPS
93	17.212	17q12	16	CIN2	Cervix	2002472	Matovina	2009	Gynecologic Oncology	DIPS
94	11.2233	11q23.3	16	CIN2	Cervix	2003194	Matovina	2009	Gynecologic Oncology	DIPS	PVRL1
95	2.2373	2q37.3	16	CIN3	Cervix	2003217	Matovina	2009	Gynecologic Oncology	DIPS
96	19.1131	19p13.11	16	CIN3	Cervix	2003379	Matovina	2009	Gynecologic Oncology	DIPS	CHERP
97	19,213.2	19q13.2	16	CIN3	Cervix	2003416	Matovina	2009	Gynecologic Oncology	DIPS	CEACAM5
98	1.1343	1p34.3	16	CIN3	Cervix	2003417	Matovina	2009	Gynecologic Oncology	DIPS
99	7.1211	7p21.1	16	CIN3	Cervix	2004077	Matovina	2009	Gynecologic Oncology	DIPS	AHR
100	10.2212	10q21.2	16	cancer	Cervix	2004377	Matovina	2009	Gynecologic Oncology	DIPS	MRF-2
101	11.1143	11p14.3	16	ND	Cervix	2004410	Matovina	2009	Gynecologic Oncology	DIPS
102	1.2313	1q31.3	16	cancer	Cervix	196035658	Fan	2023	Cell Genomics	NGS
103	23.1112	Xp11.21	16	cancer	Anus	01-009	Sastre	2021	CCR	NGS	WNK3
104	9.2221	9q22.1	16	cancer	Anus	01-016	Sastre	2021	CCR	NGS	SPATA31E1
105	1.2232	1q23.2	16	cancer	Cervix	01-017	Sastre	2021	CCR	NGS	ATP1A2
106	12.212	12q12	16	cancer	Cervix	01-018	Sastre	2021	CCR	NGS	PDZRN4
107	10.2263	10q26.3	68	cancer	Cervix	01-019	Sastre	2021	CCR	NGS	MIR378C
	1.1313	1p31.3	68	cancer	Cervix	01-019	Sastre	2021	CCR	NGS	NFIA
108	14.2132	14q13.2	16	cancer	Anus	01-024	Sastre	2021	CCR	NGS	BCL11B
	14.2322	14q32.2	16	cancer	Anus	01-024	Sastre	2021	CCR	NGS	BCL11B
109	9.22113	9q21.13	16	cancer	Anus	01-025	Sastre	2021	CCR	NGS	ABHD17B
	2.2241	2q24.1	16	cancer	Anus	01-025	Sastre	2021	CCR	NGS	CCDC148
	9.1241	9p24.1	16	cancer	Anus	01-025	Sastre	2021	CCR	NGS	CD274
	12.2232	12q23.2	16	cancer	Anus	01-025	Sastre	2021	CCR	NGS	IGF1
	1.1341	1p34.1	16	cancer	Anus	01-025	Sastre	2021	CCR	NGS	NASP
	4.2283	4q28.3	16	cancer	Anus	01-025	Sastre	2021	CCR	NGS
	9.1222	9p22.2	16	cancer	Anus	01-025	Sastre	2021	CCR	NGS
110	17.2253	17q25.3	16	cancer	Anus	01-026	Sastre	2021	CCR	NGS	RPTOR
111	12.1121	12p12.1	16	cancer	Vulva	01-027	Sastre	2021	CCR	NGS	SOX5
112	17.2253	17q25.3	16	cancer	Cervix	01-030	Sastre	2021	CCR	NGS	CCDC40
113	5.2112	5q11.2	56	cancer	Cervix	01-031	Sastre	2021	CCR	NGS	ITGA1
114	9.23411	9q34.11	16	cancer	Cervix	01-033	Sastre	2021	CCR	NGS	PKN3
115	21.2213	21q21.3	11	cancer	Anus	01-034	Sastre	2021	CCR	NGS	GRIK1
	1.13631	1p36.31	16	cancer	Anus	01-034	Sastre	2021	CCR	NGS	PLEKHG5
	9.22113	9q21.13	16	cancer	Anus	01-034	Sastre	2021	CCR	NGS
116	4.23121	4q31.21	18	cancer	Cervix	01-035	Sastre	2021	CCR	NGS	INPP4B
	9.22233	9q22.33	18	cancer	Cervix	01-035	Sastre	2021	CCR	NGS	LOC101928438
117	17.2231	17q23.1	16	cancer	Cervix	01-036	Sastre	2021	CCR	NGS	VMP1
118	18.2213	18q21.33	16	cancer	Cervix	01-044	Sastre	2021	CCR	NGS	PHLPP1
119	3.1242	3p24.2	16	cancer	Anus	01-049	Sastre	2021	CCR	NGS	NGLY1
120	9.22232	9q22.32	18	cancer	Cervix	01-054	Sastre	2021	CCR	NGS	C9orf3
121	4.2213	4q21.3	31	cancer	Cervix	01-055	Sastre	2021	CCR	NGS	MAPK10
122	13.2142	13q14.2	45	cancer	Cervix	01-056	Sastre	2021	CCR	NGS	RB1
123	7.1142	7p14.2	16	cancer	H&N	01-057	Sastre	2021	CCR	NGS	ELMO1
	10.2231	10q23.1	16	cancer	H&N	01-057	Sastre	2021	CCR	NGS	NRG3
124	17.2253	17q25.3	16	cancer	H&N	01-060	Sastre	2021	CCR	NGS	BAHCC1
125	18.223	18q23	16	cancer	H&N	01-060	Sastre	2020	CCR	NGS	PARD6G
126	13.2121	13q12.12	16	cancer	H&N	01-060	Sastre	2021	CCR	NGS	SGCG
127	3.1261	3p26.1	16	cancer	Cervix	01-068	Sastre	2021	CCR	NGS	GRM7
	2.1241	2p24.1	16	cancer	Cervix	01-068	Sastre	2021	CCR	NGS	HS1BP3
128	7.1222	7p22.2	16	cancer	Cervix	01-070	Sastre	2021	CCR	NGS	SDK1
129	6.212	6q12	16	cancer	H&N	01-073	Sastre	2021	CCR	NGS	ADGRB3
	5.1143	5p14.3	16	cancer	H&N	01-073	Sastre	2021	CCR	NGS	CDH12
	2.2361	2q36.1	16	cancer	H&N	01-073	Sastre	2021	CCR	NGS	LOC440934
130	5.2331	5q33.1	16	cancer	Cervix	01-081	Sastre	2021	CCR	NGS	LOC105378231
	4.1152	4p15.2	16	cancer	Cervix	01-081	Sastre	2021	CCR	NGS	PPARGC1A
131	5.2351	5q35.1	18	cancer	Cervix	01-083	Sastre	2021	CCR	NGS	LINCO1048
132	17.2251	17q25.1	16	cancer	Anus	01-084	Sastre	2021	CCR	NGS	EXO7
133	12.2243	12q24.31	16	cancer	Cervix	01-085	Sastre	2021	CCR	NGS	KTNC1 CLIP1
134	16.112	16p12	16	cancer	Cervix	01-086	Sastre	2021	CCR	NGS	GSG1L
	6.221	6q21	16	cancer	Cervix	01-086	Sastre	2021	CCR	NGS	LOC101927768
	6.1253	6p25.3	16	cancer	Cervix	01-086	Sastre	2021	CCR	NGS	LOC1022723944
	20.2112	20q11.22	16	cancer	Cervix	01-086	Sastre	2021	CCR	NGS	PIGU
135	1.241	1q41	16	cancer	Anus	01-088	Sastre	2021	CCR	NGS	SLC30A10
136	2.2223	2q22.3	16	cancer	Anus	01-089	Sastre	2021	CCR	NGS	TEX41
	11.1154	11p15.4	16	cancer	Anus	01-089	Sastre	2021	CCR	NGS	TRIM5
137	6.2232	6q23.2	16	cancer	Cervix	01-090	Sastre	2021	CCR	NGS	SGK1
	19.112	19p12	16	cancer	Cervix	01-090	Sastre	2021	CCR	NGS	ZNF208
138	3.12131	3p21.31	16	cancer	Cervix	01-091	Sastre	2021	CCR	NGS	CCDC12
139	11.2231	11q23.1	16	cancer	Anus	01-093	Sastre	2021	CCR	NGS	BTG4
140	4.1163	4p16.3	16	cancer	Cervix	01-100	Sastre	2021	CCR	NGS	TACC3
141	2.234	2q34	16	cancer	Cervix	02-002	Sastre	2021	CCR	NGS	IKZF2
	13.2221	13q22.1	16	cancer	Cervix	02-002	Sastre	2021	CCR	NGS		PIBF1 KLF5 KLF12
142	17.2212	17q21.2	16	cancer	Cervix	02-003	Sastre	2021	CCR	NGS
143	17.2231	17q23.1	45	cancer	cervix	02-004	Sastre	2021	CCR	NGS	VMP1
144	6.1211	6p21.1	16	cancer	Cervix	02-007	Sastre	2021	CCR	NGS	LOC107986598
145	12.2232	12q23.2	18	cancer	Cervix	02-008	Sastre	2021	CCR	NGS	SLC17A8	TMEM132B
146	5.2213	5q21.3	16	cancer	Cervix	02-009	Sastre	2021	CCR	NGS	FBXL17
	1.243	1q43	16	cancer	Cervix	02-009	Sastre	2021	CCR	NGS	SDCCAG8
147	3.1142	3p14.2	45	cancer	Cervix	02-012	Sastre	2021	CCR	NGS	FHIT
148	5.232	5q32	31	cancer	Cervix	02-013	Sastre	2021	CCR	NGS	CAMK2A
	5.232	5q32	31	cancer	Cervix	02-013	Sastre	2021	CCR	NGS	CDX1
	11.113	11p13	31	cancer	Cervix	02-013	Sastre	2021	CCR	NGS	DCDC1
	1.2321	1q32.1	31	cancer	Cervix	02-013	Sastre	2021	CCR	NGS	KDM5B
149	5.1132	5p13.2	18	Cancer	Cervix	02-014	Sastre	2021	CCR	NGS	IL7R
	16.221	16q21	18	cancer	Cervix	02-014	Sastre	2021	CCR	NGS
150	1.2211	1q21.1	45	cancer	Cervix	02-015	Sastre	2021	CCR	NGS	HYDIN2
	18.2112	18q11.2	45	cancer	Cervix	02-015	Sastre	2021	CCR	NGS
151	17.1112	17p11.2	16	cancer	Cervix	02-016	Sastre	2021	CCR	NGS
152	4.2213	4q21.3	45	cancer	Cervix	02-025	Sastre	2021	CCR	NGS	MAPK10
153	2.2242	2q24.2	18	cancer	Cervix	02-028	Sastre	2021	CCR	NGS	BAZ2B
	8.22421	8q24.21	18	cancer	Cervix	02-028	Sastre	2021	CCR	NGS	CASC21 CASC8
	5.2222	5q22.2	18	cancer	Cervix	02-028	Sastre	2021	CCR	NGS	EPB41L4A
	4.23121	4q31.21	18	cancer	Cervix	02-028	Sastre	2021	CCR	NGS	INPP4B
	2.115	2p15	18	cancer	Cervix	02-028	Sastre	2021	CCR	NGS	WDPCP
154	23.1213	Xp21.3	51	cancer	Cervix	02-029	Sastre	2021	CCR	NGS	IL1RAPL1
	8.2243	8q24.3	51	cancer	Cervix	02-029	Sastre	2021	CCR	NGS	TSNARE1
155	8.22421	8q24.21	18	cancer	Cervix	02-030	Sastre	2021	CCR	NGS	CASC21
	2.2363	2q36.3	18	cancer	Cervix	02-030	Sastre	2021	CCR	NGS	COL4A4
	4.114	4p14	18	cancer	Cervix	02-030	Sastre	2021	CCR	NGS	RBM47
	18.2123	18q12.3	18	cancer	Cervix	02-030	Sastre	2021	CCR	NGS	SLC14A2
156	13.2313	13q31.3	59	cancer	Cervix	02-031	Sastre	2021	CCR	NGS	GPC6
	1,159.3	1p31.3	59	cancer	Cervix	02-031	Sastre	2021	CCR	NGS	NFIA
157	2.2243	2q24.3	35	cancer	Cervix	02-032	Sastre	2021	CCR	NGS	FIGN
158	8.11123	8p11.23	33	cancer	Cervix	02-033	Sastre	2021	CCR	NGS	LETM2
	10.1123	10p12.31	33	cancer	Cervix	02-033	Sastre	2021	CCR	NGS	MALRD1
159	12.1133	12p13.33	16	cancer	Cervix	02-034	Sastre	2021	CCR	NGS	CACNA1C
	7,236.1	7q36.1	16	cancer	Cervix	02-034	Sastre	2021	CCR	NGS	KMT2C
	2.112	2p12	16	cancer	Cervix	02-034	Sastre	2021	CCR	NGS	LOC105374830
	20.2131	20q13.12	16	cancer	Cervix	02-034	Sastre	2021	CCR	NGS	TOX2
	3.2111	3q11.1	16	cancer	Cervix	02-034	Sastre	2021	CCR	NGS
160	9.2311	9q31.1	16	cancer	Cervix	02-037	Sastre	2021	CCR	NGS	ALDOB
	9.123	9p23	16	cancer	Cervix	02-037	Sastre	2021	CCR	NGS	LURAP1L
	10.2243	10q24.31	16	cancer	Cervix	02-037	Sastre	2021	CCR	NGS	PAX2
161	17.212	17q12	16	cancer	Cervix	02-042	Sastre	2021	CCR	NGS	ERBB2
162	2.2233	2q23.3	18	cancer	Cervix	02-043	Sastre	2021	CCR	NGS	LOC105373684
163	1.241	1q41	16	cancer	Cervix	02-044	Sastre	2021	CCR	NGS	SUSD4
164	18.2212	18q21.2	16	cancer	Cervix	02-045	Sastre	2021	CCR	NGS	MAPK4
	9.1133	9p13.3	16	cancer	Cervix	02-045	Sastre	2021	CCR	NGS
165	13.2221	13q22.1	16	cancer	Cervix	02-046	Sastre	2021	CCR	NGS		PIBF1 KLF5 KLF12
166	3.2213	3q21.3	16	cancer	Cervix	02-047	Sastre	2021	CCR	NGS	ISY1
	22.2122	22q12.2	16	cancer	Cervix	02-047	Sastre	2021	CCR	NGS	THOC5
	3.228	3q28	16	cancer	Cervix	02-047	Sastre	2021	CCR	NGS	TPRG1
167	18.2213	18q21.33	33	cancer	Cervix	02-048	Sastre	2021	CCR	NGS	RNF152
168	17.212	17q12	51	cancer	Cervix	02-049	Sastre	2021	CCR	NGS	RAD51L3
169	1.1343	1p34.3	51	cancer	Cervix	02-050	Sastre	2021	CCR	NGS	LOC105378657
170	14.2323	14q32.32	16	SCC	H&N	10T	Olthof	2014	PLOS One	APOT	TRAF3
171	1.136	1p36	16	cancer	H&N	10T	Gao	2014	J Clin Virol	NGS
172	22.2133	22q13.31	16	SCC	H&N	11O/P	Olthof	2014	PLOS One	APOT	PHF21B
173	12.2242	12q24.22	16	SCC	H&N	12T	Olthof	2014	PLOS One	APOT	ATXN2
174	17.2231	17q23.1	16	SCC	H&N	13T	Olthof	2014	PLOS One	APOT	TUBD1
175	4.222	4q22	16	cancer	H&N	17T	Gao	2014	J Clin Virol	NGS
176	8.1123	8p12.3	16	SCC	H&N	1T	Olthof	2014	PLOS One	APOT
177	9.2223	9q22.3	16	SCC	H&N	20T	Olthof	2014	PLOS One	APOT	FANCC
178	18.2213	18q21.3	16	SCC	H&N	21T	Olthof	2014	PLOS One	APOT	BCL2
179	1.13633	1p36.33	16	SCC	H&N	22BOT	Olthof	2014	PLOS One	APOT	LOC100652939
180	9.2223	9q22.3	16	SCC	H&N	24T	Olthof	2014	PLOS One	APOT	FANCC
181	13.222	13q22	16	SCC	H&N	25T	Olthof	2014	PLOS One	APOT	NC_000013.10
	13.212	13q12	16	SCC	H&N	25T	Olthof	2014	PLOS One	APOT	SLC7A11
182	4.2221	4q22.1	16	SCC	H&N	27O	Olthof	2014	PLOS One	APOT	FAM190A
	1.231	1q31.1	16	SCC	H&N	27O	Olthof	2014	PLOS One	APOT	NC_000001.10
183	8.11121	8p11.21	16	SCC	H&N	28T	Olthof	2014	PLOS One	APOT	ZMAT4
184	4.226	4q26	16	SCC	H&N	29T	Olthof	2014	PLOS One	APOT	SYNPO2
185	2.1232	2p23.2	16	SCC	H&N	2T/PM	Olthof	2014	PLOS One	APOT	BRE
186	17.2212	17q21.2	16	SCC	H&N	3BOT	Olthof	2014	PLOS One	APOT
187	18.2122	18q12.2	16	SCC	H&N	4T	Olthof	2014	PLOS One	APOT	ONO80C
188	12.113	12p13	16	SCC	H&N	4T	Gao	2014	J Clin Virol	NGS
	14.224	14q24	16	SCC	H&N	4T	Gao	2014	J Clin Virol	NGS
189	3.1143	3p14.3	58	HSIL	Cervix	58-H1	Li	2012	IJGC	DIPS
	8.1213	8p21.3	58	HSIL	Cervix	58-H1	Li	2012	IJGC	DIPS
	16.1132	16p13.2	58	HSIL	Cervix	58-H1	Li	2012	IJGC	DIPS
190	22.2133	22q13.32	58	HSIL	Cervix	58-H2	Li	2012	IJGC	DIPS
191	17.2253	17q25.3	58	LSIL	Cervix	58-L1	Li	2012	IJGC	DIPS
192	9.2332	9q33.2	58	LSIL	Cervix	58-L2	Li	2012	IJGC	DIPS
193	10.2112	10q11.21	58	SCC	Cervix	58-S1	Li	2012	IGCS	DIPS
	15.2251	15q25.1	58	SCC	Cervix	58-S1	Li	2012	IJGC	DIPS
194	1.13633	1p36.33	16	SCC	H&N	5T	Olthof	2014	PLOS One	APOT	LOC100652939
	6.215	6q15	16	SCC	H&N	5T	Olthof	2014	PLOS One	APOT	PNRC1
195	3.228	3q28	16	SCC	H&N	6T	Olthof	2014	PLOS One	APOT	TP63	189782873
196	22.2133	22q13.32	16	SCC	H&N	7T	Olthof	2014	PLOS One	APOT	DEPDC5
197	5.213	5q13.2	16	SCC	H&N	8T/BOT	Olthof	2014	PLOS One	APOT	LOC1001170939
198	15.215	15q15	16	SCC	H&N	9O	Olthof	2014	PLOS One	APOT	NC_000015.9
199	4.228	4q28	16	Bowen	Vulve	Bowen 3	Nakanishi	2009	Clinical & Exp Derm	APOT
200	3.225	3q25	16	Bowen	Vulva	Bowen 4	Nakanishi	2009	Clinical & Exp Derm	APOT
	11.212	11q12	16	Bowen	Vulva	Bowen 4	Nakanishi	2009	Clin & Exp Dermatology	APOT
201	18.2121	18q12.1	16	cancer	Anus	CA01	Jeannot	2018	Genes Chr & Cancer	DIPS	DSG3 (0)
	17.2253	17q25.3	16	cancer	Anus	CA01	Jeannot	2018	Genes Chr & Cancer	DIPS	FASN (0)	CCDC57 (0)
202	20.1122	20p12.2	16	cancer	Anus	CA03	Jeannot	2018	Genes Chr & Cancer	DIPS	SLX4IP
203	19.1132	19p13.2	16	cancer	Anus	CA04	Jeannot	2018	Genes Chr & Cancer	DIPS	NFIX (0)
204	9.2223	9q22.3	16	cancer	Anus	CA05	Jeannot	2018	Genes Chr & Cancer	DIPS	FOXE (5)	XPA (165)
	14.2241	14q24.1	16	cancer	Anus	CA05	Jeannot	2018	Genes Chr & Cancer	DIPS	RAD51B		68787620
205	1.1221	1p22.1	16	cancer	Anus	CA07	Jeannot	2018	Genes Chr & Cancer	DIPS	BCAR3 (0)
	3.1261	3p26.1	16	cancer	Anus	CA07	Jeannot	2018	Genes Chr & Cancer	DIPS	BHLHE40 (2)
206	7.234	7q34	16	cancer	Anus	CA09	Jeannot	2018	Genes Chr & Cancer	DIPS	AGK (0)
	19.1132	19p13.2	16	cancer	Anus	CA09	Jeannot	2018	Genes Chr & Cancer	DIPS	NFIX (2300)	ILF3 (0)
207	15.2131	15q13.1	16	cancer	Anus	CA10	Jeannot	2018	Genes Chr & Cancer	DIPS	APBA2 (0)
	1.1323	1p32.3	16	cancer	Anus	CA10	Jeannot	2017	Genes Chr & Cancer	DIPS	DMRTA2 (0,5)	FAF1 (24)
208	9.22111	9q21.11	16	cancer	Anus	CA14	Jeannot	2018	Genes Chr & Cancer	DIPS	PIP5K1B (0)
209	3.2223	3q22.3	16	cancer	Anus	CA15	Jeannot	2017	Genes Chr & Cancer	DIPS	IL20RB
210	1.2233	1q23.3	16	cancer	Anus	CA16	Jeannot	2018	Genes Chr & Cancer	DIPS	ATF6	DUSP12 (2)
	15.2223	15q22.31	16	cancer	Anus	CA16	Jeannot	2018	Genes Chr & Cancer	DIPS	CSNK1G1 (0)
	2.1233	2p23.3	16	cancer	Anus	CA16	Jeannot	2017	Genes Chr & Cancer	DIPS	DTNB (0.5)
211	8.2211	8q21.1	16	cancer	Anus	CA19	Jeannot	2018	Genes Chr & Cancer	DIPS	FAM100B (300)
212	19.1132	19p13.2	16	cancer	Anus	CA21	Jeannot	2018	Genes Chr & Cancer	DIPS	NFIX (0)	TRMT1 (0)
	8.22421	8q24.21	16	cancer	Anus	CA21	Jeannot	2018	Genes Chr & Cancer	DIPS	PVT1	MYC (150)
213	8.2231	8q23.1	16	cancer	Anus	CA26	Jeannot	2018	Genes Chr & Cancer	DIPS	MSRA1 (0)
214	19.2132	19q13.2	16	cancer	Anus	CA29	Jeannot	2018	Genes Chr & Cancer	DIPS	repeated sequences
215	6.1253	6p25.3	16	cancer	Anus	CA30	Jeannot	2018	Genes Chr & Cancer	DIPS	FOXQ1 (175)	FOXF2 (32)
216	6.1252	6p25.2	16	cancer	Anus	CA30	Jeannot	2018	Genes Chr & Cancer	DIPS	SERPINB9 (11)	SERPINB6 (32)
217	19.2121	18q12.2	16	cancer	Anus	CA31	Jeannot	2018	Genes Chr & Cancer	DIPS	CCDC178 (68)
	19.1132	19p13.2	16	cancer	Anus	CA31	Jeannot	2018	Genes Chr & Cancer	DIPS	NFIX (663)	ZNF563 (0)
218	6.1111	6p11.1	16	cancer	Anus	CA32	Jeannot	2018	Genes Chr & Cancer	DIPS	GUSBP4 (500)
	6.227	6q27	16	cancer	Anus	CA33	Jeannot	2018	Genes Chr & Cancer	DIPS	RPS6KA2 (0)
219	19.1132	19p13.2	16	cancer	Anus	CA35	Jeannot	2018	Genes Chr & Cancer	DIPS	NFIX (0)
	16.2221	16q22.1	16	cancer	Anus	CA35	Jeannot	2018	Genes Chr & Cancer	DIPS	TRADD (0)
220	22.2111	22q11.1	16	cancer	Anus	CA37	Jeannot	2018	Genes Chr & Cancer	DIPS	CECR1
221	15.2213	15q21.3	18	Cell line	Cervix	CAC-1	Peter	2006	Oncogene	DIPS/APOT	DYX1C1
	8.224	8q24	18	Cell line	Cervix	CAC-1	Peter	2006	Oncogene	DIPS/APOT	MYC		128,424,413	128,503,231
222	7.21121	7q11.21	16	SCC	Cervix	CT1019	Das	2012	PLOS One	APOT	TYW1
223	18.2112	18q11.2	16	SCC	Cervix	CT1087	Das	2012	PLOS One	APOT
224	4.22122	4q21.22	16	SCC	Cervix	CT1114	Das	2012	PLOS One	APOT	HNRPDL
225	6.22231	6q22.31	16	AC	Cervix	CT1117	Das	2012	PLOS One	APOT
226	6.2233	6q23.3	16	SCC	Cervix	CT1122	Das	2012	PLOS One	APOT	PDE7B
227	1.13633	1p36.33	16	SCC	Cervix	CT1138	Das	2012	PLOS One	APOT
228	8.22421	8q24.21	16	SCC	Cervix	CT1160	Das	2012	PLOS One	APOT	MYC
229	9.22232	9q22.32	16	SCC	Cervix	CT1162	Das	2012	PLOS One	APOT	C9orf3
230	11.2131	11q13.1	16	SCC	Cervix	CT1169	Das	2012	PLOS One	APOT	DRAP1
231	20.2112	20q11.21	16	SCC	Cervix	CT1170	Das	2012	PLOS One	APOT	COX412
232	11.2131	11q13.1	16	SCC	Cervix	CT1183	Das	2012	PLOS One	APOT	DRAP1
233	3.2262	3q26.2	16	cancer	Cervix	CT1210	Das	2012	PLOS One	APOT	MECOM
234	1.13623	1p36.23	16	SCC	Cervix	CT700	Das	2012	PLOS One	APOT
235	1.13623	1p36.24	16	SCC	Cervix	CT702	Das	2012	PLOS One	APOT
236	3.22633	3q26.33	16	SCC	Cervix	CT706	Das	2012	PLOS One	APOT	SOX2
237	1.13623	1p36.25	16	SCC	Cervix	CT709	Das	2012	PLOS One	APOT
238	3.228	3q28	16	SCC	Cervix	CT711	Das	2012	PLOS One	APOT	LEPREL1
239	1.13612	1p36.12	16	SCC	Cervix	CT712	Das	2012	PLOS One	APOT	ALPQTL2
240	9.22232	9q22.32	16	SCC	Cervix	CT714	Das	2012	PLOS One	APOT	C9orf3
241	3.22631	3q26.31	16	SCC	Cervix	CT723	Das	2012	PLOS One	APOT
242	3.228	3q28	16	SCC	Cervix	CT739	Das	2012	PLOS One	APOT	TP63	ND
243	18.2213	18q21.33	18	SCC	Cervix	CT740	Das	2012	PLOS One	APOT
244	9.23411	9q34.11	16	SCC	Cervix	CT753	Das	2012	PLOS One	APOT	SLC25A25
245	3.223	3q23	16	cancer	Cervix	CT755	Das	2012	PLOS One	APOT	SLC25A36
246	20.2112	20q11.21	16	cancer	Cervix	CT785	Das	2012	PLOS One	APOT	COX412
	3.223	3q23	16	cancer	Cervix	CT785	Das	2012	PLOS One	APOT	SLC25A36
247	8.11121	8p11.21	16	SCC	Cervix	CT796	Das	2012	PLOS One	APOT
248	1.13633	1p36.34	16	SCC	Cervix	CT809	Das	2012	PLOS One	APOT
249	10.2233	10q23.33	16	SCC	Cervix	CT821	Das	2012	PLOS One	APOT
250	11.2143	11q14.3	16	SCC	Cervix	CT836	Das	2012	PLOS One	APOT
251	20.2131	20q13.13	16	SCC	Cervix	CT839	Das	2012	PLOS One	APOT
252	6.2233	6q23.3	16	SCC	Cervix	CT846	Das	2012	PLOS One	APOT	MAP3K
253	17.212	17q12	16	SCC	Cervix	CT848	Das	2012	PLOS One	APOT	HNF1B
254	10.2233	10q23.31	16	SCC	Cervix	CT859	Das	2012	PLOS One	APOT	PTEN
255	1.24213	1q42.13	16	cancer	Cervix	CT864	Das	2013	PLOS One	APOT	ABCB10
256	1.13633	1p36.35	16	SCC	Cervix	CT866	Das	2012	PLOS One	APOT
257	11.2233	11q23.3	16	SCC	Cervix	CT871	Das	2012	PLOS One	APOT	ARCN1
258	19.2144	19q14.43	16	SCC	Cervix	CT889	Das	2012	PLOS One	APOT
259	3.22633	3q26.33	16	SCC	Cervix	CT892	Das	2012	PLOS One	APOT
260	6.22231	6q22.31	16	SCC	Cervix	CT893	Das	2012	PLOS One	APOT
261	13.2221	13q22.1	16	SCC	Cervix	CT896	Das	2012	PLOS One	APOT
262	19.1133	19p13.3	16	SCC	Cervix	CT906	Das	2012	PLOS One	APOT
263	17.2231	17q23.1	16	SCC	Cervix	CT914	Das	2012	PLOS One	APOT	VMP1
264	8.11121	8p11.21	16	SCC	Cervix	CT915	Das	2012	PLOS One	APOT
265	20.2112	20q11.21	16	SCC	Cervix	CT918	Das	2012	PLOS One	APOT	COX412
266	13.2123	13q12.3	16	SCC	Cervix	CT927	Das	2012	PLOS One	APOT	POMP
267	13.2221	13q22.1	16	SCC	Cervix	CT976	Das	2012	PLOS One	APOT	KLF5
268	4.2133	4q13.3	16	SCC	Cervix	CT999	Das	2012	PLOS One	APOT	IL8
269	3.228	3q28	16	VIN3	Vulve	CU-VI-8	Bryant	2014	J Med Virol	DIPS
270	23.1222	Xp22.2	33	SCC	Cervix	D3335	Kraus	2008	Cancer Res	APOT	MID1
271	8.2223	8q22.3	33	SCC	Cervix	D3385	Kraus	2008	Cancer Res	APOT	BX119528
272	4.2133	4q13.3	18	SCC	Cervix	D3421	Kraus	2008	Cancer Res	APOT	chr4.75.005a
273	4,213.3	4q13.3	45	SCC	Cervix	D3458	Kraus	2008	Cancer Res	APOT	NT_006216;31
274	8.22421	8q24.21	18	cancer	Cervix	D3464	Kraus	2008	Cancer Res	APOT	sweeker
275	14.2241	14q24.1	45	SCC	Cervix	D3484	Kraus	2008	Cancer Res	APOT	RAD51B		na
276	4.2283	4q28.3	18	SCC	Cervix	D3545	Kraus	2008	Cancer Res	APOT	SLC7A11
277	1.1213	1p21.3	45	SCC	Cervix	D3571	Kraus	2008	Cancer Res	APOT
278	6.125	6p25	18	SCC	Cervix	D3601	Kraus	2008	Cancer Res	APOT	RREB1
279	3.1262	3p26.2	45	SCC	Cervix	D3622	Kraus	2008	Cancer Res	APOT	hmm12935
280	8.22421	8q24.21	45	SCC	Cervix	D3631	Kraus	2008	Cancer Res	APOT	sweeker
281	13.2221	13q22.1	45	SCC	Cervix	D3632	Kraus	2008	Cancer Res	APOT	BG182794
282	11.2222	11q22.2	45	SCC	Cervix	D3647	Kraus	2008	Cancer Res	APOT	hmm26110
283	10.2243	10q24.31	18	SCC	Cervix	D3708	Kraus	2008	Cancer Res	APOT	NPM3
284	13.2221	13q22.1	18	SCC	Cervix	D3772	Kraus	2008	Cancer Res	APOT	BG182794
285	17.2212	17q21.2	31	SCC	Cervix	D3773	Kraus	2008	Cancer Res	APOT	KRT42P
286	12.2213	12q21.32	45	SCC	Cervix	D3819	Kraus	2008	Cancer Res	APOT	PCDH9
287	4.2323	4q32.3	45	SCC	Cervix	D3826	Kraus	2008	Cancer Res	APOT	NT_022792.8
288	3.228	3q28	45	SCC	Cervix	D3829	Kraus	2008	Cancer Res	APOT	LEPREL1
289	7.231	7q31	18	SCC	Cervix	D3835	Kraus	2008	Cancer Res	APOT	IMMP2L
290	4.212	4q12	18	SCC	Cervix	D3899	Kraus	2008	Cancer Res	APOT	hmm35522
291	2.2322	2q32.2	31	SCC	Cervix	D3931	Kraus	2008	Cancer Res	APOT	snerklar
292	16.2222	16q22.2	33	SCC	Cervix	D3962	Kraus	2008	Cancer Res	APOT	COG8
293	2.2333	2q33.3	45	SCC	Cervix	D3994	Kraus	2008	Cancer Res	APOT	KLF7
294	13.2221	13q22.1	18	SCC	Cervix	D3996	Kraus	2008	Cancer Res	APOT	KLF5
295	3.228	3q28	45	SCC	Cervix	D4023	Kraus	2008	Cancer Res	APOT
296	5.231	5q31	18	cancer	Cervix	D4026	Kraus	2008	Cancer Res	APOT	ARHGAP
	5.2313	5q31.3	18	SCC	Cervix	D4026	Kraus	2008	Cancer Res	APOT	ARHGAP26
297	2.234	2q34	18	SCC	Cervix	D4034	Kraus	2008	Cancer Res	APOT	NT_005403.1081
298	7.2312	7q31.2	45	SCC	Cervix	D4039	Kraus	2008	Cancer Res	APOT	CFTR
299	8.2212	8q21.2	18	SCC	Cervix	D4045	Kraus	2008	Cancer Res	APOT	NT_008046.7
	8.2213	8q21.2	18	cancer	Cervix	D4045	Kraus	2008	Cancer Res	APOT
300	4.2133	4q13.3	45	SCC	Cervix	D4049	Kraus	2008	Cancer Res	APOT
301	8.2212	8q21.2	45	SCC	Cervix	D4056	Kraus	2008	Cancer Res	APOT	NT_008046.7
302	2.2221	2q22.1	18	SCC	Cervix	DNR3918	Kraus	2008	Cancer Res	APOT	LRP1B
303	23.225	Xq25	18	SCC	Cervix	DNR3923	Kraus	2008	Cancer Res	APOT	SMARCA1
304	13.2221	13q22.1	45	CIN3	Cervix	F250	Kraus	2008	Cancer Res	APOT	NT_024524.1096
305	2.2241	2q24.1	45	CIN3	Cervix	F251	Kraus	2008	Cancer Res	APOT	GPD2
306	8.22421	8q24.21	18	CIN3	Cervix	F284	Kraus	2008	Cancer Res	APOT	chr8_1126.1
307	9.112	9p12	45	CIN3	Cervix	F343	Kraus	2008	Cancer Res	APOT	contactin associated pl3
308	12.2213	12q21.33	45	CIN3	Cervix	F380	Kraus	2008	Cancer Res	APOT
309	8.224	8q24	18	cancer	Cervix	HK10	Ferber	2003	Oncogene	RS-PCR
310	19.113	19p13	18	cancer	Cervix	HK11	Ferber	2003	Oncogene	RS-PCR	PRKACA
311	9.222	9q22	18	cancer	Cervix	HK13	Ferber	2003	Oncogene	RS-PCR	FANCC
312	14.2241	14q24.1	18	cancer	Cervix	HK15	Ferber	2003	Oncogene	RS-PCR
313	5.215	5q15	18	cancer	Cervix	HK16	Ferber	2003	Oncogene	RS-PCR
314	2.2221	2q22.1	18	cancer	Cervix	HK9	Ferber	2003	Oncogene	RS-PCR	LRP1B
315	1,221.2	1q21.2	16	cancer	Cervix	HPV16-1	Brant	2019	Genomics	RNA-seq	MCL1
316	9.1112	9p11.2	16	cancer	Cervix	HPV16-12	Brant	2019	Genomics	RNA-seq
317	1.2321	1q32.1	16	cancer	Cervix	HPV16-2	Brant	2019	Genomics	RNA-seq
318	4.231	4q31	16	cancer	Cervix	HPV16-3	Brant	2019	Genomics	RNA-seq
319	20,214.22	20q14.22	16	cancer	Cervix	HPV16-4	Brant	2019	Genomics	RNA-seq	PXMP4
320	13.2221	13q22.1	16	cancer	Cervix	HPV16-5	Brant	2019	Genomics	RNA-seq
	23.2213	Xq21.31	16	cancer	Cervix	HPV16-5	Brant	2019	Genomics	RNA-seq
321	11.2222	11q22.2	16	cancer	Cervix	HPV16-9	Brant	2019	Genomics	RNA-seq
322	15.2213	15q21.3	18	cancer	Cervix	HPV18-1	Brant	2019	Genomics	RNA-seq	ALDH1A2
323	2.1163	2p16.3	18	cancer	Cervix	HPV18-10	Brant	2019	Genomics	RNA-seq	NRXN1
324	3.228	3q28	18	cancer	Cervix	HPV18-2	Brant	2019	Genomics	RNA-seq	TP63	189889340
325	11.2222	11q22.2	18	cancer	Cervix	HPV18-3	Brant	2019	Genomics	RNA-seq	MMP13
326	2.2363	2q36.3	18	cancer	Cervix	HPV18-5	Brant	2019	Genomics	RNA-seq	SLC16A14
327	20.2131	20q13.13	18	cancer	Cervix	HPV18-6	Brant	2019	Genomics	RNA-seq
328	14.2231	14q23.1	18	cancer	Cervix	HPV18-7	Brant	2019	Genomics	RNA-seq	PRKCH
329	3.1253	3p25.3	18	cancer	Cervix	HPV18-8	Brant	2019	Genomics	RNA-seq	HRH1
330	14.2241	14q24.1	18	cancer	Cervix	HPV18-9	Brant	2019	Genomics	RNA-seq	RAD51B		68561998	68562438
331	8.224	8q24	18	cancer	Cervix	IC1	Peter	2006	Oncogene	DIPS/APOT	MYC		128,430,753	128,417,091
332	8.224	8q24	16	cancer	Cervix	IC2	Peter	2006	Oncogene	DIPS/APOT	MYC		128,360,635	128,357,802
333	8.224	8q24	16	cancer	Cervix	IC3	Peter	2006	Oncogene	DIPS/APOT	MYC		127,905,623
334	7.231	7q31	18	cancer	Cervix	IC5	Peter	2006	Oncogene	DIPS-PCR	ZNF277
335	13.2221	13q22.1	18	cancer	Cervix	IC6	Peter	2006	Oncogene	DIPS/APOT	KLF12
	8.224	8q24	18	cancer	Cervix	IC6	Peter	2006	Oncogene	DIPS/APOT	MYC		127,993,014	127,970,699
336	1.232	1q32	16	cancer	Cervix	IC7	Peter	2006	Oncogene	APOT	CAMK1G
337	19.1132	19p13.2	18	cancer	Cervix	IC8	Peter	2006	Oncogene	DIPS/APOT	NFIX (0)
338	14.2241	14q24.1	16	cancer	Cervix	int1	Wentzenzen	2002	Oncogene	APOT	EST HS57811
339	13.2212	13q21.2	16	cancer	Cervix	int10	Wentzenzen	2002	Oncogene	APOT
340	17.223	17q23	18	cancer	Cervix	int13	Wentzenzen	2002	Oncogene	APOT	EST HS 12677
341	15.212	15q12	18	VaIN3	Vagin	int14	Wentzenzen	2002	Oncogene	APOT	EST HS150715
342	21.221	21q21	18	cancer	Cervix	int15	Wentzenzen	2002	Oncogene	APOT	Alu
343	8.1112	8p11.2	18	cancer	Cervix	int16	Wentzenzen	2002	Oncogene	APOT	EST HS127775
344	5.235	5q35	16	cancer	Cervix	int17	Wentzenzen	2002	Oncogene	APOT	ALU
345	4.231	4q31	16	VIN2	Vulve	int18	Wentzenzen	2002	Oncogene	APOT
346	10.115	10p15	16	cancer	Cervix	int19	Wentzenzen	2002	Oncogene	APOT
347	4.116	4p16	16	cancer	Cervix	int2	Wentzenzen	2002	Oncogene	APOT
348	21.222	21q22	16	VaIN2	Vagin	int20	Wentzenzen	2002	Oncogene	APOT
349	6.225	6q25	16	VIN3	Vulve	int21	Wentzenzen	2002	Oncogene	APOT	TCP1
350	8.224	8q24	18	cancer	Cervix	int25	Wentzenzen	2002	Oncogene	APOT	MYC
351	3.228	3q28	18	cancer	Cervix	int26	Wentzenzen	2002	Oncogene	APOT
352	12.221	12q21	18	cancer	Cervix	int27	Wentzenzen	2002	Oncogene	APOT	Alu
353	2.124	2p24	16	cancer	Cervix	int3	Wentzenzen	2002	Oncogene	APOT	repeat HERV gp70
354	13.221	13q21	16	cancer	Cervix	int30	Wentzenzen	2002	Oncogene	APOT
355	3.228	3q28	16	VIN3	Vulve	int32	Wentzenzen	2002	Oncogene	APOT
356	17.212	17q12	16	cancer	Cervix	int33	Wentzenzen	2002	Oncogene	APOT	EST HS23106
357	10.226	10q26	16	CIN2	Cervix	int34	Wentzenzen	2002	Oncogene	APOT
358	4.221	4q21	18	cancer	Cervix	int35	Wentzenzen	2002	Oncogene	APOT
359	9.234	9q34	16	cancer	Cervix	int36	Wentzenzen	2002	Oncogene	APOT
360	3.228	3q28	16	VINX	Vulve	int4	Wentzenzen	2002	Oncogene	APOT	TP63	Coding region
361	8.224	8q24	16	cancer	Cervix	int41	Wentzenzen	2002	Oncogene	APOT
362	8.123	8p23	16	cancer	Cervix	int42	Wentzenzen	2002	Oncogene	APOT	EST HS162183
363	9.113	9p13	16	cancer	Cervix	int44	Wentzenzen	2002	Oncogene	APOT
364	2.233	2q33	16	cancer	Cervix	int45	Wentzenzen	2002	Oncogene	APOT	EST AA084805
365	5.231	5q31	16	cancer	Cervix	int46	Wentzenzen	2002	Oncogene	APOT	KLHL3
366	9.222	9q22	16	cancer	Cervix	int5	Wentzenzen	2002	Oncogene	APOT	FANCC
367	13.214	13q14	16	VIN3	Vulve	int50	Wentzenzen	2002	Oncogene	APOT	KPNA3
368	2.231	2q31	16	CIN3	Cervix	int52	Wentzenzen	2002	Oncogene	APOT
369	19.213	19q13	16	CIN3	Cervix	int54	Wentzenzen	2002	Oncogene	APOT	CEACAM5
370	14.213	14q13	18	cancer	Cervix	int55	Wentzenzen	2002	Oncogene	APOT
371	13.222	13q22	16	CIN3	Cervix	int57	Wentzenzen	2002	Oncogene	APOT
372	13.221	13q21	16	cancer	Cervix	int58	Wentzenzen	2002	Oncogene	APOT
373	20.111	20p11	16	cancer	Cervix	int6	Wentzenzen	2002	Oncogene	APOT	EST HS97790
374	16.212	16q12	16	cancer	Cervix	int61	Wentzenzen	2002	Oncogene	APOT	AFP
375	15.215	15q15	16	cancer	Cervix	int62	Wentzenzen	2002	Oncogene	APOT	EST HS195730
376	3.121	3p21	18	cancer	Cervix	int65	Wentzenzen	2002	Oncogene	APOT
377	1.243	1q43	18	cancer	Cervix	int66	Wentzenzen	2002	Oncogene	APOT	CHS1
378	13.221	13q21	16	CIN3	Cervix	int67	Wentzenzen	2002	Oncogene	APOT
379	4.221	4q21	16	CIN3	Cervix	int68	Wentzenzen	2002	Oncogene	APOT	PTPN13
380	1.232	1q32	16	CIN3	Cervix	int69	Wentzenzen	2002	Oncogene	APOT	EST HS205126
381	2.223	2q23	16	cancer	Cervix	int70	Wentzenzen	2002	Oncogene	APOT
382	2.232	2q32	16	cancer	Cervix	int71	Wentzenzen	2002	Oncogene	APOT	GLS
383	3.221	3q21	16	cancer	Cervix	int72	Wentzenzen	2002	Oncogene	APOT	EST A1555655
384	1.221	1q21-23	16	cancer	Cervix	int73	Wentzenzen	2002	Oncogene	APOT	RPS27 HS195453
385	7.221	7q21	16	cancer	Cervix	int74	Wentzenzen	2002	Oncogene	APOT
386	6.221	6q21	16	cancer	Cervix	int76	Wentzenzen	2002	Oncogene	APOT
387	10.223	10q23	16	cancer	Cervix	int78	Wentzenzen	2002	Oncogene	APOT	FER1L3
388	10.222	10q22	16	cancer	Cervix	int79	Wentzenzen	2002	Oncogene	APOT
389	20.112	20p12	16	cancer	Cervix	int8	Wentzenzen	2002	Oncogene	APOT
390	1.136	1p36	16	cancer	Cervix	int9	Wentzenzen	2002	Oncogene	APOT	WASF2 HS288908
391	7.21123	7q11.23	18		Cervix	LBC105	Lagström	2019	Nature Scientific Reports	NGS
392	19.213	19q13	18	cancer	Cervix	LU2	Ferber	2003	Oncogene	RS-PCR	CEACAM5
393	15.223	15q23	18	cancer	Cervix	LU3	Ferber	2013	Oncogene	RS-PCR
394	1.2322	1q32.2	18	cancer	Cervix	LU7	Ferber	2003	Oncogene	RS-PCR	CD34
395	8.2241	8q24.1	18	cancer	Cervix	LU8	Ferber	2003	Oncogene	RS-PCR
396	5.115	5p15	18	cancer	Cervix	MC11	Ferber	2003	Oncogene	RS-PCR	HTERT
397	8.1211	8p21.1	18	cancer	Cervix	MC123	Ferber	2003	Oncogene	RS-PCR	EPHX2
	3.114	3p14	18	cancer	Cervix	MC123	Ferber	2003	Oncogene	RS-PCR	FHIT
	6.226	6q26-27	18	cancer	Cervix	MC123	Ferber	2003	Oncogene	RS-PCR	KIAA1838
398	8.224	8q24	18	cancer	Cervix	MC31	Ferber	2003	Oncogene	RS-PCR
399	5.1132	5p13.2	18	cancer	Cervix	MC315	Ferber	2003	Oncogene	RS-PCR	SLC1A3
400	14.2243	14q24.3	18	cancer	Cervix	MC34	Ferber	2003	Oncogene	RS-PCR	RNGTT
401	1.2311	1q31.1	18	cancer	Cervix	MC360	Ferber	2003	Oncogene	RS-PCR
402	8.224	8q24	18	cancer	Cervix	MC391	Ferber	2003	Oncogene	RS-PCR
403	8.224	8q24	18	cancer	Cervix	MC398	Ferber	2003	Oncogene	RS-PCR
404	8.2242	8q24.2	18	cancer	Cervix	MC415	Ferber	2003	Oncogene	RS-PCR
405	18.221	18q21	68	Cell line	Cervix	ME180	Reuter	1998	EMBO J	APOT
406	2.2331	2q33.1	16	cancer	Cervix	MOCC-0001-B	Fan	2023	Cell Genomics	NGS	CLK1
	2.2331	2q33.1	16	cancer	Cervix	MOCC-0001-B	Fan	2023	Cell Genomics	NGS	FAM126B
	2.2331	2q33.1	16	cancer	Cervix	MOCC-0001-B	Fan	2023	Cell Genomics	NGS	NDUFB3
	19.1133	19p13.3	16	cancer	Cervix	MOCC-0001-B	Fan	2023	Cell Genomics	NGS	STK11
407	8.2121	8q12.1	16	cancer	Cervix	MOCC-0002-B	Fan	2023	Cell Genomics	NGS	LYN
408	4.1163	4p16.3	16	cancer	Cervix	MOCC-0003-B	Fan	2023	Cell Genomics	NGS
409	18.2213	18q21.31	16	cancer	Cervix	MOCC-0004-B	Fan	2023	Cell Genomics	NGS	ATP8B1
410	2.2212	2q21.2	34	cancer	Cervix	MOCC-0004-B	Fan	2023	Cell Genomics	NGS	NCKAP5
411	2.2233	2q23.3	16	cancer	Cervix	MOCC-0005-B	Fan	2023	Cell Genomics	NGS	ARHGAP15
	14.2211	14q21.1	16	cancer	Cervix	MOCC-0005-B	Fan	2023	Cell Genomics	NGS	FOXA1
	14.2211	14q21.1	16	cancer	Cervix	MOCC-0005-B	Fan	2023	Cell Genomics	NGS	MIPOL1/TTC6
412	10.2222	10q22.2	33	cancer	Cervix	MOCC-0006-B	Fan	2023	Cell Genomics	NGS	ADK
413	4.2322	4q32.2	31	cancer	Cervix	MOCC-0007-B	Fan	2023	Cell Genomics	NGS
414	16.2222	16q22.2	16	cancer	Cervix	MOCC-0008-B	Fan	2023	Cell Genomics	NGS	CDH1
	16.2222	16q22.2	16	cancer	Cervix	MOCC-0008-B	Fan	2023	Cell Genomics	NGS	TANGO6
415	8.22121	8q24.21	16	cancer	Cervix	MOCC-0009-A	Fan	2023	Cell Genomics	NGS	LINC00976
416	4.2133	4q13.3	16	cancer	Cervix	MOCC-000A-B	Fan	2023	Cell Genomics	NGS	MTHFD2L
417	15.2263	15q26.2	16	cancer	Cervix	MOCC-000C-B	Fan	2023	Cell Genomics	NGS	MEF2A
418	17.1131	17p13.1	16	cancer	Cervix	MOCC-000D-B	Fan	2023	Cell Genomics	NGS	CDH3
419	11.2233	11q23.3	16	cancer	Cervix	MOCC-000E-B	Fan	2023	Cell Genomics	NGS	CADM1
	20.1111	20p11.1	16	cancer	Cervix	MOCC-000E-B	Fan	2023	Cell Genomics	NGS
420	7.2223	7q22.3	16	cancer	Cervix	MOCC-000G-A	Fan	2023	Cell Genomics	NGS	LHFPL3-AS2
421	23.223	Xq23	16	cancer	Cervix	MOCC-000H-B	Fan	2023	Cell Genomics	NGS
422	20.1121	20p12.1	16	cancer	Cervix	MOCC-000I-B	Fan	2023	Cell Genomics	NGS	MACROD2
	14.2221	14q22.1	16	cancer	Cervix	MOCC-000I-B	Fan	2023	Cell Genomics	NGS
423	1.2233	1q23.3	16	cancer	Cervix	MOCC-000J-B	Fan	2023	Cell Genomics	NGS
424	1.1122	1p12.2	16	cancer	Cervix	MOCC-000K-B	Fan	2023	Cell Genomics	NGS	CH17-472G23-4
425	1.2322	1q32.2	16	cancer	Cervix	MOCC-000L-B	Fan	2023	Cell Genomics	NGS
426	19.1133	19p13.3	16	cancer	Cervix	MOCC-000M-B	Fan	2023	Cell Genomics	NGS	CPAMD8
	6.1111	6p11.1	16	cancer	Cervix	MOCC-000M-B	Fan	2023	Cell Genomics	NGS
427	6.2161	6q16.1	16	cancer	Cervix	MOCC-000N-B	Fan	2023	Cell Genomics	NGS	EPHA7
	4.2311	4q31.1	16	cancer	Cervix	MOCC-000N-B	Fan	2023	Cell Genomics	NGS
428	15.2251	15q25.1	16	cancer	Cervix	MOCC-000Q-B	Fan	2023	Cell Genomics	NGS
429	13.2221	13q22.1	16	cancer	Cervix	MOCC-000R-B	Fan	2023	Cell Genomics	NGS
430	3.224	3q24	16	cancer	Cervix	MOCC-000T-B	Fan	2023	Cell Genomics	NGS	SLC9A9
431	20.1122	20p12.2	16	cancer	Cervix	MOCC-000U-B	Fan	2023	Cell Genomics	NGS	PAK5
432	14.2323	14q32.31	16	cancer	Cervix	MOCC-000W-B	Fan	2023	Cell Genomics	NGS	RCOR1
	13.2133	13q13.31	16	cancer	Cervix	MOCC-000W-B	Fan	2023	Cell Genomics	NGS	ZBTB20
433	4.2222	4q22.2	16	cancer	Cervix	MOCC-000Y-B	Fan	2023	Cell Genomics	NGS
434	13.2213	13q21.32	16	cancer	Cervix	MOCC-000Z-B	Fan	2023	Cell Genomics	NGS	PCDH9
435	22.2112	22q11.21	16	cancer	Cervix	MOCC-0010-B	Fan	2023	Cell Genomics	NGS	FAM230B
436	21.2221	21q22.11	18	cancer	Cervix	MOCC-0011-B	Fan	2023	Cell Genomics	NGS	EVA1C
	3.1142	3p14.2	18	cancer	Cervix	MOCC-0011-B	Fan	2023	Cell Genomics	NGS	FHIT
437	11.2134	11q13.4	16	cancer	Cervix	MOCC-0012-B	Fan	2023	Cell Genomics	NGS	FOLR3
	5.1133	5p13.3	16	cancer	Cervix	MOCC-0012-B	Fan	2023	Cell Genomics	NGS
438	17.2212	17q21.2	16	cancer	Cervix	MOCC-0013-B	Fan	2023	Cell Genomics	NGS
	19.1133	19p13.3	16	cancer	Cervix	MOCC-0013-B	Fan	2023	Cell Genomics	NGS
439	3.228	3q28	16	cancer	Cervix	MOCC-0015-B	Fan	2023	Cell Genomics	NGS	TP63	189893012
440	2.1223	2p22.3	16	cancer	Cervix	MOCC-0016-B	Fan	2023	Cell Genomics	NGS	TTC27
441	8.122	8p22	16	cancer	Cervix	MOCC-0017-B	Fan	2023	Cell Genomics	NGS	KIAA1456
442	16.221	16q21	16	cancer	Cervix	MOCC-0018-B	Fan	2023	Cell Genomics	NGS	CDH11
	7.2361	7q36.1	16	cancer	Cervix	MOCC-0018-B	Fan	2023	Cell Genomics	NGS	CNTNAP2
	3.22631	3q26.31	16	cancer	Cervix	MOCC-0018-B	Fan	2023	Cell Genomics	NGS	NLGN1
	8.22421	8q24.22	16	cancer	Cervix	MOCC-0018-B	Fan	2023	Cell Genomics	NGS	PVT1
443	13.2221	13q22.1	16	cancer	Cervix	MOCC-0019-B	Fan	2023	Cell Genomics	NGS
444	18.1112	18p11.21	16	cancer	Cervix	MOCC-001A-B	Fan	2023	Cell Genomics	NGS	PIEZO2
	23.1221	Xp22.11	16	cancer	Cervix	MOCC-001A-B	Fan	2023	Cell Genomics	NGS	PTCHD1
	15.214	15q14	16	cancer	Cervix	MOCC-001A-B	Fan	2023	Cell Genomics	NGS
445	9.1241	9p24.1	16	cancer	Cervix	MOCC-001B-B	Fan	2023	Cell Genomics	NGS	PDCD1LG2
	19.1133	19p13.3	16	cancer	Cervix	MOCC-001B-B	Fan	2023	Cell Genomics	NGS	ZNF208
	12.2421	12q24.21	16	cancer	Cervix	MOCC-001B-B	Fan	2023	Cell Genomics	NGS
446	1.2243	1q24.3	16	cancer	Cervix	MOCC-001C-B	Fan	2023	Cell Genomics	NGS	FMO2
447	17.212	17q12	16	cancer	Cervix	MOCC-001D-B	Fan	2023	Cell Genomics	NGS	PIP4K2B
	1.1323	1p32.3	16	cancer	Cervix	MOCC-001D-B	Fan	2023	Cell Genomics	NGS	ZFYVE9
	17.222	17q22	16	cancer	Cervix	MOCC-001D-B	Fan	2023	Cell Genomics	NGS
	21.112	21p11.2	16	cancer	Cervix	MOCC-001D-B	Fan	2023	Cell Genomics	NGS				site répété chez Fan
448	3.228	3q28	16	cancer	Cervix	MOCC-001E-B	Fan	2023	Cell Genomics	NGS
449	3.22631	3q26.31	16	cancer	Cervix	MOCC-001F-B	Fan	2023	Cell Genomics	NGS	NAALADL2
450	14.2231	14q23.1	58	cancer	Cervix	MOCC-001H-B	Fan	2023	Cell Genomics	NGS
451	23.1223	Xp22.33	16	cancer	Cervix	MOCC-001I-B	Fan	2023	Cell Genomics	NGS
452	14.2243	14q24.3	16	cancer	Cervix	MOCC-001J-B	Fan	2023	Cell Genomics	NGS
453	16.2221	16q22.1	16	cancer	Cervix	MOCC-001L-B	Fan	2023	Cell Genomics	NGS	WWP2
454	17.112	17p12	33	cancer	Cervix	MOCC-001M-B	Fan	2023	Cell Genomics	NGS	SHISA6
455	19.2132	19q13.2	45	cancer	Cervix	MOCC-001N-B	Fan	2023	Cell Genomics	NGS	CEACAM7
456	15.2213	15q21.3		cancer	Cervix	MOCC-001O-A	Fan	2023	Cell Genomics	NGS	ALDH1A2
	16.2112	16q11.2	16	cancer	Cervix	MOCC-001O-A	Fan	2023	Cell Genomics	NGS
457	10.2243	10q24.32	16	cancer	Cervix	MOCC-001P-B	Fan	2023	Cell Genomics	NGS	LBX1-AS1
458	4.22121	4q21.21	16	cancer	Cervix	MOCC-001Q-B	Fan	2023	Cell Genomics	NGS	LINC01088
	4.2313	4q31.3	16	cancer	Cervix	MOCC-001Q-B	Fan	2023	Cell Genomics	NGS	LRBA
459	21.112	21p11.2	58	cancer	Cervix	MOCC-001R-B	Fan	2023	Cell Genomics	NGS
460	12.222	12q22.2	31	cancer	Cervix	MOCC-001S-B	Fan	2023	Cell Genomics	NGS
461	11.2233	11q23.3	16	cancer	Cervix	MOCC-001T-B	Fan	2023	Cell Genomics	NGS	FXYD2
	2.2142	2q14.2	16	cancer	Cervix	MOCC-001T-B	Fan	2023	Cell Genomics	NGS	GLI2
	7.236	7q36	16	cancer	Cervix	MOCC-001T-B	Fan	2023	Cell Genomics	NGS	KMT2C
	23.1223	Xp22.33	16	cancer	Cervix	MOCC-001T-B	Fan	2023	Cell Genomics	NGS	PRKX
	20.2131	20q13.13	16	cancer	Cervix	MOCC-001T-B	Fan	2023	Cell Genomics	NGS	ZNFX1
	4.211	4q21.1	16	cancer	Cervix	MOCC-001T-B	Fan	2023	Cell Genomics	NGS
462	22.2133	22q13.3	33	cancer	Cervix	MOCC-001U-B	Fan	2023	Cell Genomics	NGS	RBFOX2
	5.1122	5p12.2	33	cancer	Cervix	MOCC-001U-B	Fan	2023	Cell Genomics	NGS
463	3.228	3q28	16	cancer	Cervix	MOCC-001V-B	Fan	2023	Cell Genomics	NGS	TP63	189876429
464	10.2251	10q25.1	16	cancer	Cervix	MOCC-001X-B	Fan	2023	Cell Genomics	NGS
465	3.1212	3p21.2	16	cancer	Cervix	MOCC-001Y-B	Fan	2023	Cell Genomics	NGS	DOCK3
466	4.2133	4q13.3	18	cancer	Cervix	MOCC-001Z-B	Fan	2023	Cell Genomics	NGS
467	5.11533	5p15.33	16	cancer	Cervix	MOCC-0020-B	Fan	2023	Cell Genomics	NGS
468	3.1142	3p14.2	58	cancer	Cervix	MOCC-0021-B	Fan	2023	Cell Genomics	NGS	FHIT
	2.2221	2q22.1	16	cancer	Cervix	MOCC-0021-B	Fan	2023	Cell Genomics	NGS	LRP1B
469	2.2312	2q31.2	16	cancer	Cervix	MOCC-0022-B	Fan	2023	Cell Genomics	NGS	NFE2L2
	8.2231	8q23.1	16	cancer	Cervix	MOCC-0022-B	Fan	2023	Cell Genomics	NGS	RP1L1
	21.2213	21q21.3	16	cancer	Cervix	MOCC-0022-B	Fan	2023	Cell Genomics	NGS
470	9.22232	9q22.32	16	cancer	Cervix	MOCC-0023-B	Fan	2023	Cell Genomics	NGS	C9orf3
471	13.2123	13q12.3	16	cancer	Cervix	MOCC-0024-B	Fan	2023	Cell Genomics	NGS	MTUS2
	4.2213	4q21.3	16	cancer	Cervix	MOCC-0024-B	Fan	2023	Cell Genomics	NGS	SLC10A6
472	4.2133	4q13.3	16	cancer	Cervix	MOCC-0025-B	Fan	2023	Cell Genomics	NGS
473	4.113	4p13	18	cancer	Cervix	MOCC-0026-B	Fan	2023	Cell Genomics	NGS	LIMCH1
	5.2331	5q33.1	18	cancer	Cervix	MOCC-0026-B	Fan	2023	Cell Genomics	NGS
474	8.22421	8q24.21	18	cancer	Cervix	MOCC-0027-B	Fan	2023	Cell Genomics	NGS	CASC8
475	23.1221	Xp22.11	16	cancer	Cervix	MOCC-0029-B	Fan	2023	Cell Genomics	NGS	PCYT1B
476	3.2123	3q12.3	16	cancer	Cervix	MOCC-002A-B	Fan	2023	Cell Genomics	NGS
	23.2273	Xq27.3	16	Cancer	Cervix	MOCC-002A-B	Fan	2023	Cell Genomics	NGS
477	19.2133	19q13.32	16	cancer	Cervix	MOCC-002D-B	Fan	2023	Cell Genomics	NGS	ZNF296
478	16.1121	16p12.1	16	cancer	Cervix	MOCC-002E-B	Fan	2023	Cell Genomics	NGS	IL4R	KIAA0556
479	1.1313	1p31.3	16	cancer	Cervix	MOCC-002G-B	Fan	2023	Cell Genomics	NGS	NFIA
480	17.2213	17q21.32	16	cancer	Cervix	MOCC-002I-B	Fan	2023	Cell Genomics	NGS	CALCOCO2
	15.2112	15q11.2	16	cancer	Cervix	MOCC-002I-B	Fan	2023	Cell Genomics	NGS
481	23.2272	Xq27.2	16	cancer	Cervix	MOCC-002J-B	Fan	2023	Cell Genomics	NGS
482	18.2122	18q12.2	16	cancer	Cervix	MOCC-002K-B	Fan	2023	Cell Genomics	NGS	RPRD1A
483	6.22233	6q22.33	16	cancer	Cervix	MOCC-002L-B	Fan	2023	Cell Genomics	NGS	PTPRK
484	6.22232	6q22.32	16	cancer	Cervix	MOCC-002M-B	Fan	2023	Cell Genomics	NGS	NCOA7	TRMT11
485	2.2241	2q24.1	16	cancer	Cervix	MOCC-002Q-B	Fan	2023	Cell Genomics	NGS	NR4A2
	17.1133	17p13.3	16	cancer	Cervix	MOCC-002Q-B	Fan	2023	Cell Genomics	NGS	SMG6
486	21.2223	21q22.3	18	cancer	Cervix	MOCC-002R-B	Fan	2023	Cell Genomics	NGS
487	20.1121	20p12.1	16	cancer	Cervix	MOCC-002S-B	Fan	2023	Cell Genomics	NGS	MACROD2
488	2.1251	2p25.1	58	cancer	Cervix	MOCC-002T-B	Fan	2023	Cell Genomics	NGS	GREB1
489	11.2221	11q22.1	58	cancer	Cervix	MOCC-002Y-A	Fan	2023	Cell Genomics	NGS
490	10.2112	10q11.23	16	cancer	Cervix	MOCC-0032-B	Fan	2023	Cell Genomics	NGS	PRKG1
491	4.2313	4q31.3	58	cancer	Cervix	MOCC-0034-B	Fan	2023	Cell Genomics	NGS	LRBA
492	8.22421	8q24.21	16	cancer	Cervix	MRI-H186	Xu	2013	PLOS One	NGS	MYC
493	11.1112	11p11.2	16	cancer	Cervix	MRI-H186	Xu	2013	PLOS One	NGS	PTPRJ
494	18.2112	18q11.2	45	Cell line	Cervix	MS751	Lagström	2019	Nature Scientific Reports	NGS		publiée Geisbill JGV1997
495	16.1133	16p13.3	16	SCC	Penis	PC17	Annunziata	2012	Pathol Oncol Res	DIPS	TRAP1
496	8.2213	8q21.3	16	cancer	Penis	PC8	Annunziata	2012	Pathol Oncol Res	DIPS	FAM92A1
497	17.212	17q12	16	cancer	Cervix	R130	Kamal	2020	BJC	NGS	ERBB2
498	17.2231	17q23.1	18	cancer	Cervix	R131	Kamal	2020	BJC	NGS	VMP1
499	1.2213	1q21.3	16	cancer	Cervix	R133	Kamal	2020	BMJ	NGS	ENSA
	8.2243	8q24.3	16	cancer	Cervix	R133	Kamal	2020	BJC	NGS	MROH5
	8.22421	8q24.21	16	cancer	Cervix	R133	Kamal	2020	BJC	NGS	PVT1
500	2.2372	2q37.2	16	cancer	Cervix	R135	Kamal	2020	BJC	NGS	SH3BP4
501	8.2223	8q22.3	16	cancer	Cervix	R136	Kamal	2020	BJC	NGS	AZIN1
	14.2211	14q21.1	16	cancer	Cervix	R136	Kamal	2020	BJC	NGS	MIPOL1/TTC6
	4.23123	4q31.23	16	cancer	Cervix	R136	Kamal	2020	BJC	NGS	NR3C2
502	23.2213	Xq21.33	16	cancer	Cervix	R137	Kamal	2020	BJC	NGS	DIAPH2
503	19.2132	19q13.2	16	cancer	Cervix	R138	Kamal	2020	BJC	NGS	SNRPA
504	20.2132	20q13.2	16	cancer	Cervix	R139	Kamal	2020	BJC	NGS	TSHZ2
505	4.112	4p12	16	cancer	H&N	R14	Mainguené	2022	Mol Oncol	NGS	CNGA1
	2.2371	2q37.1	16	cancer	H&N	R14	Mainguené	2022	Mol Oncol	NGS	DGKD
	5.11533	5p15.33	16	cancer	H&N	R14	Mainguené	2022	Mol Oncol	NGS	LOC728613
506	6.1223	6p22.3	16	cancer	Cervix	R140	Kamal	2020	BMJ	NGS	CMAHP
507	16.1133	16p13.3	16	cancer	Cervix	R141	Kamal	2020	BJC	NGS	CREBBP
	7.2362	7q36.2	16	cancer	Cervix	R141	Kamal	2020	BJC	NGS	DPP6
	3.1111	3p11.1	16	cancer	Cervix	R141	Kamal	2020	BMJ	NGS	EPHA3
	16.1133	16p13.3	16	cancer	Cervix	R141	Kamal	2020	BJC	NGS	TRAP1
508	17.2213	17q21.33	16	cancer	Cervix	R144	Kamal	2020	BMC	NGS	ABCC3
	3.22631	3q26.31	16	cancer	Cervix	R144	Kamal	2020	BJC	NGS	FNDC3B
	5.2352	5q35.2	16	cancer	Cervix	R144	Kamal	2020	BJC	NGS	HMP19
	8.122	8p22	16	cancer	Cervix	R144	Kamal	2020	BJC	NGS	SGCZ
	19.1132	19p13.2	16	cancer	Cervix	R144	Kamal	2020	BJC	NGS	ZNF844
509	19.2133	19q13.33	33	cancer	Cervix	R145	Kamal	2020	BJC	NGS	RPL13A	meme cas ?
510	20.1121	20p12.1	52	cancer	Cervix	R152	Kamal	2020	BJC	NGS	MACROD2
511	7.1143	7p14.3	16	cancer	Cervix	R153	Kamal	2020	BJC	NGS	AVL9
	19.2132	19,q13.2	16	cancer	Cervix	R153	Kamal	2020	BMJ	NGS	CEACAM6
	8.1232	8p23.2	16	cancer	Cervix	R153	Kamal	2020	BJC	NGS	CSMD1
	18.1113	18p11.31	16	cancer	Cervix	R153	Kamal	2020	BMJ	NGS	DLGAP1
	1.244	1q44	16	cancer	Cervix	R153	Kamal	2020	BJC	NGS	KIF26B
	19.2131	19q13.11	16	cancer	Cervix	R153	Kamal	2020	BJC	NGS	LINCO1531
	3.228	3q28	16	cancer	Cervix	R153	Kamal	2020	BJC	NGS	LINCR-0002
	11.221	11q21	16	cancer	Cervix	R153	Kamal	2020	BJC	NGS	MAML2
	15.2223	15q22.31	16	cancer	Cervix	R153	Kamal	2020	BJC	NGS	MEGF11
	3.22631	3q26.31	16	cancer	Cervix	R153	Kamal	2020	BJC	NGS	NAALADL2
	17.2112	17q11.2	16	cancer	Cervix	R153	Kamal	2020	BJC	NGS	NSRP1
	3.224	3q24	16	cancer	Cervix	R153	Kamal	2020	BJC	NGS	PLSCR5
	1.244	1q44	16	cancer	Cervix	R153	Kamal	2020	BJC	NGS	SMYD3
	6.12131	6p21.31	16	cancer	Cervix	R153	Kamal	2020	BJC	NGS	TULP1
512	3.228	3q28	16	cancer	Cervix	R155	Kamal	2020	BJC	NGS	LPP
513	18.1113	18p11.32	16	cancer	Cervix	R159	Kamal	2020	BMJ	NGS	EMILIN2
	13.2141	13q14.11	16	cancer	Cervix	R159	Kamal	2020	BMJ	NGS	ENOX1
514	3.1261	3p26.1	59	cancer	Cervix	R161	Kamal	2020	BJC	NGS	GRM7
	14.2243	14q24.3	59	cancer	Cervix	R161	kamal	2020	BJC	NGS	HEATR4
	3.228	3q28	59	cancer	Cervix	R161	Kamal	2020	BJC	NGS	LEPREL1
	3.228	3q28	59	cancer	Cervix	R161	Kamal	2020	BJC	NGS	LEPREL2
	6.1243	6p24.3	59	cancer	Cervix	R161	Kamal	2020	BJC	NGS	SSR1
515	12.1121	12p12.1	31	cancer	Cervix	R163	Kamal	2020	BJC	NGS	SSPN
516	5.2351	5q35.1	16	cancer	Cervix	R164	kamal	2020	BJC	NGS	NEURL1B
	9.2313	9q31.3	16	cancer	Cervix	R164	Kamal	2020	BJC	NGS	SUSD1
	9.2313	9q31.3	16	cancer	Cervix	R164	Kamal	2020	BJC	NGS	UGCG
517	5.2123	5q12.3	73	cancer	Cervix	R165	Kamal	2020	BJC	NGS	MAST4
	4.2131	4q13.1	73	cancer	Cervix	R165	Kamal	2020	BJC	NGS	TECRL
518	13.2221	13q22.1	16	cancer	Cervix	R166	Kamal	2020	BJC	NGS	KLF12
	13.2221	13q22.1	16	cancer	Cervix	R166	Kamal	2020	BJC	NGS	PIBF1
519	2.114	2p14	59	cancer	Cervix	R167	Kamal	2020	BJC	NGS	MEIS1
520	4.2133	4q13.3	16	cancer	Cervix	R168	Kamal	2020	BJC	NGS	CXCL1
	4.2133	4q13.3	16	cancer	Cervix	R168	Kamal	2020	BJC	NGS	CXCL2
	4.2133	4q13.3	45	cancer	Cervix	R168	Kamal	2020	BJC	NGS	MTHFD2L
521	23.1114	Xp11.4	16	cancer	Cervix	R169	Kamal	2020	BMJ	NGS	ATP6AP2
522	3.22631	3q26.31	18	cancer	Cervix	R173	Kamal	2020	BJC	NGS	NAALADL2
523	3.228	3q28	59	cancer	Cervix	R174	Kamal	2020	BJC	NGS	TP63	189589485
524	2.2121	2q12.1	18	cancer	Cervix	R176	Kamal	2020	BMJ	NGS	TGFBRAP1
525	8.22412	8q24.12	16	cancer	Cervix	R179	Kamal	2020	BJC	NGS	SAMD12
526	13.2121	13q12.12	16	cancer	Cervix	R180	Kamal	2020	BMJ	NGS	CENPJ
527	2.2331	2q33.1	16	cancer	Cervix	R184	Kamal	2020	BJC	NGS	PLCL1
528	8.22421	8q24.21	16	cancer	Cervix	R187	Kamal	2020	BJC	NGS	CASC21 CASC8
	8.22421	8q24.21	16	cancer	Cervix	R187	Kamal	2020	BJC	NGS	PVT1
529	1.2251	1q25.1	31	cancer	Cervix	R19	Kamal	2020	BMJ	NGS	CACYBP
	18.2213	18q21.33	31	cancer	Cervix	R19	Kamal	2020	BJC	NGS	PIGN
	18.2213	18q21.33	31	cancer	Cervix	R19	Kamal	2020	BJC	NGS	PIGN/K1AA146
530	15.2212	15q21.2	18	cancer	Cervix	R192	Kamal	2020	BJC	NGS	SLC27A2
531	3.228	3q28	18	cancer	Cervix	R194	Kamal	2020	BMJ	NGS	CLDN16
532	16.2221	16q22.1	18	cancer	Cervix	R195	Kamal	2020	BJC	NGS	CDH16
533	19.2132	19q13.2	45	cancer	Cervix	R196	Kamal	2020	BMJ	NGS	CEACAM5
534	9.1241	9p24.1	18	cancer	Cervix	R197	Kamal	2020	BJC	NGS	IL33
535	23.2223	Xq22.3	16	cancer	Cervix	R199	Kamal	2020	BJC	NGS	COL4A5
536	14.2323	14q32.31	18	cancer	Cervix	R20	Kamal	2020	BJC	NGS	WDR20	même cas?
537	13.2333	13q33.3	56	cancer	Cervix	R204	Kamal	2020	BJC	NGS	MYO16
538	5.2312	5q31.2	16	cancer	Cervix	R206	Kamal	2020	BJC	NGS	NRG2
539	2.2232	2q23.2	45	cancer	Cervix	R209	Kamal	2020	BJC	NGS	MMADHC
540	15.2223	15q22.31	18	cancer	Cervix	R21	Kamal	2020	BJC	NGS	RAB11A
541	5.2333	5q33.3	16	cancer	Cervix	R215	Kamal	2020	BJC	NGS	SGCD
542	16.1112	16p11.2	16	cancer	Cervix	R216	Kamal	2020	BJC	NGS	ITGAL
	16.1131	16p13.11	16	cancer	Cervix	R216	Kamal	2020	BJC	NGS	MYH11
	1.13621	1p36.21	16	cancer	Cervix	R216	Kamal	2020	BJC	NGS	PRAMEF34P
	2.2243	2q24.3	16	cancer	Cervix	R216	Kamal	2020	BJC	NGS	STK39
543	1.243	1q43	16	cancer	Cervix	R217	Kamal	2020	BMJ	NGS	CEP170
	1.1223	1p22.3	16	cancer	Cervix	R217	Kamal	2020	BMJ	NGS	COL24A1
	16.1133	16p13.3	16	cancer	Cervix	R217	Kamal	2020	BJC	NGS	CREBBP
	23.1222	Xp22.2	16	cancer	Cervix	R217	Kamal	2020	BJC	NGS	MID1
544	5.11533	5p15.33	16	cancer	Cervix	R218	Kamal	2020	BJC	NGS	CLPTM1L
	5.11533	5p15.33	16	cancer	Cervix	R218	Kamal	2020	BJC	NGS	SLC6A3
545	4.2213	4q21.3	16	cancer	Cervix	R220	Kamal	2020	BJC	NGS	SLC10A6
546	6.1123	6p12.3	16	cancer	Cervix	R221	Kamal	2020	BMJ	NGS	ANKRD66
	11.2221	11q22.1	16	cancer	Cervix	R221	Kamal	2020	BMJ	NGS	ARHGAP42
	3.1121	3p12.1	16	cancer	Cervix	R221	Kamal	2020	BMJ	NGS	CADM2
	11.2141	11q14.1	16	cancer	Cervix	R221	Kamal	2020	BJC	NGS	DLG2
	2.115	2p15	16	cancer	Cervix	R221	Kamal	2020	BJC	NGS	MDH1
	19.1133	19p13.3	16	cancer	Cervix	R221	Kamal	2020	BJC	NGS	SH3GL1
	19.1133	19p13.3	16	cancer	Cervix	R221	Kamal	2020	BJC	NGS	STAP2
	23.1223	Xp22.31	16	cancer	Cervix	R221	Kamal	2020	BJC	NGS	STS
	6.1211	6p21.1	16	cancer	Cervix	R221	Kamal	2020	BJC	NGS	TMEM63B
	8.2222	8q22.2	16	cancer	Cervix	R221	Kamal	2020	BJC	NGS	VPS13B
547	4.1163	4p16.3	16	cancer	Cervix	R222	Kamal	2020	BJC	NGS	FGFR3	TACC3
	4.1163	4p16.3	16	cancer	Cervix	R222	Kamal	2020	BJC	NGS	NSD2
548	2.2371	2q37.1	45	cancer	Cervix	R223	Kamal	2020	BJC	NGS	DGKD
	2.2371	2q37.1	45	cancer	Cervix	R223	Kamal	2020	BJC	NGS	USP40
549	10.1151	10p15.1	16	cancer	Cervix	R224	Kamal	2020	BJC	NGS	AKR1C3
	12.1121	12p12.1	16	cancer	Cervix	R224	Kamal	2020	BJC	NGS	LOC645177
	11.2222	11q22.2	16	cancer	Cervix	R224	Kamal	2020	BJC	NGS	PDGFD
	10.2263	10q26.3	16	cancer	Cervix	R224	Kamal	2020	BJC	NGS	TCERGIL
	6.1212	6p21.2	16	cancer	Cervix	R224	Kamal	2020	BJC	NGS	ZFAND3
550	1,132.3	1p32.3	16	cancer	Cervix	R225	Kamal	2020	BJC	NGS	ORC1
	1,132.3	1p32.3	16	cancer	Cervix	R225	Kamal	2020	BJC	NGS	ZCCHC
551	14.2231	14q23.1	73	cancer	Cervix	R228	Kamal	2020	BJC	NGS	PRKCH
552	5.2311	5q31.1	18	cancer	Cervix	R229	Kamal	2020	BJC	NGS	ACLS6
553	22.2122	22q12.2	16	cancer	Cervix	R230	Kamal	2020	BJC	NGS	TBC1D10A
554	3.228	3q28	45	cancer	Cervix	R231	Kamal	2020	BJC	NGS	TP63	189585530
555	1.2241	1q24.1	73	cancer	Cervix	R234	Kamal	2020	BJC	NGS	LOC400794
556	11.113	11p13	16	cancer	Cervix	R236	Kamal	2020	BMJ	NGS	EHF
	8.2223	8q22.3	16	cancer	Cervix	R236	Kamal	2020	BJC	NGS	NCALD
557	13.2213	13q21.33	18	cancer	Cervix	R238	Kamal	2020	BJC	NGS	BMP5
	1.2311	1q31.1	18	cancer	Cervix	R238	Kamal	2020	BMJ	NGS	BRINP3
	2.2311	2q31.1	18	cancer	Cervix	R238	Kamal	2020	BJC	NGS	ERICH2
	2.1223	2p22.3	18	cancer	Cervix	R238	Kamal	2020	BJC	NGS	LINCOO486
	20.2112	20q11.23	18	cancer	Cervix	R238	Kamal	2020	BJC	NGS	PHF20
558	13.2133	13q13.3	16	cancer	Cervix	R24	Kamal	2020	BMJ	NGS	EXOSC8
	13.2133	13q13.3	16	cancer	Cervix	R24	Kamal	2020	BMJ	NGS	EXOSC9
559	7.2361	7q36.1	52	cancer	Cervix	R240	Kamal	2020	BJC	NGS	LRC61
560	14.2211	14q21.1	16	cancer	Cervix	R241	Kamal	2020	BJC	NGS	FOXA1
	14.2211	14q21.1	16	cancer	Cervix	R241	Kamal	2020	BJC	NGS	MIPOL1/TTC6
561	10.2223	10q22.3	73	cancer	Cervix	R243	Kamal	2020	BJC	NGS	ZMIZ1
562	19.1131	19p13.11	16	cancer	Cervix	R244	Kamal	2020	BJC	NGS	JAK3
563	11.2231	11q23.1	18	cancer	Cervix	R248	Kamal	2020	BJC	NGS	SIK2
564	6.2111	6q11.1	16	cancer	Cervix	R249	Kamal	2020	BJC	NGS	KHDRBS2
565	19.2134	19q13.42	68	cancer	Cervix	R25	Kamal	2020	BJC	NGS	EPN1	meme cas ?
566	3.228	3q28	16	cancer	Cervix	R250	Kamal	2020	BJC	NGS	LEPREL1
567	8.22421	8q24.21	18	cancer	Cervix	R251	Kamal	2020	BJC	NGS	LINCOO824
568	3.228	3q28	73	cancer	Cervix	R252	Kamal	2020	BJC	NGS	TP63	189595951
569	14.2322	14q32.2	16	cancer	Cervix	R253	Kamal	2020	BMJ	NGS	BCL11B
	5.2311	5q31.1	16	cancer	Cervix	R253	Kamal	2020	BJC	NGS	C5Orf66
	5.2231	5q23.1	16	cancer	Cervix	R253	Kamal	2020	BMJ	NGS	COMMD10
	4.2213	4q21.3	16	cancer	Cervix	R253	Kamal	2020	BJC	NGS	PTPN13
570	3.21331	3q13.31	73	cancer	Cervix	R254	Kamal	2020	BJC	NGS	ZBTB20
571	3.229	3q29	18	cancer	Cervix	R255	Kamal	2020	BJC	NGS	SMCO1
572	2.1221	2p22.1	52	cancer	Cervix	R256	Kamal	2020	BJC	NGS	GALM
573	3.142	3p14.2	16	cancer	Cervix	R258	Kamal	2020	BJC	NGS	FHIT
574	10.114	10p14	18	cancer	Cervix	R262	Kamal	2020	BJC	NGS	PROSER2-AS?
575	3.2213	3q21.3	18	cancer	Cervix	R263	Kamal	2020	BMJ	NGS	EEFSEC
	3.22631	3q26.31	18	cancer	Cervix	R263	Kamal	2020	BJC	NGS	NLGN1
	8.21121	8q11.21	18	cancer	Cervix	R263	Kamal	2020	BJC	NGS	SPIDR
576	6.2232	6q23.2	33	cancer	Cervix	R264	Kamal	2020	BJC	NGS	SGK1
577	1.133	1p33	16	cancer	Cervix	R266	Kamal	2020	BJC	NGS	AGBL4
	1.2322	1q32.2	16	cancer	Cervix	R266	Kamal	2020	BJC	NGS	LINCO1696
	20.1121	20p12.1	16	cancer	Cervix	R266	Kamal	2020	BJC	NGS	MACROD2
	1.2322	1q32.2	16	cancer	Cervix	R266	Kamal	2020	BJC	NGS	MIR205HG
	17.2231	17q23.1	16	cancer	Cervix	R266	Kamal	2020	BJC	NGS	TUBD1
578	16.1112	16p11.2	16	cancer	Cervix	R267	Kamal	2020	BJC	NGS	NFATC2IP
	1.13621	1p36.21	16	cancer	Cervix	R268	Kamal	2020	BJC	NGS	PDPN
579	6.1222	6p22.2	16	cancer	Cervix	R269	Kamal	2020	BMJ	NGS	CARMIL1
	3.142	3p14.2	16	cancer	Cervix	R269	Kamal	2020	BJC	NGS	FHIT
	1.1341	1p34.1	16	cancer	Cervix	R269	Kamal	2020	BJC	NGS	KLF17
	19.2133	19q13.33	16	cancer	Cervix	R269	Kamal	2020	BJC	NGS	LIG1
	1.2311	1q31.1	16	cancer	Cervix	R269	Kamal	2020	BMJ	NGS	LINCO1720
	14.2211	14q21.1	16	cancer	Cervix	R269	Kamal	2020	BJC	NGS	MIPOL1/TTC6
	7.2323	7q32.3	16	cancer	Cervix	R269	Kamal	2020	BJC	NGS	MKLN1
	1.1341	1p34.1	16	cancer	Cervix	R269	Kamal	2020	BJC	NGS	SLC6A9
	2.2242	2q24.2	16	cancer	Cervix	R269	Kamal	2020	BJC	NGS	TANC1
	13.234	13q34	16	cancer	Cervix	R269	Kamal	2020	BJC	NGS	TUBGCP3
	19.2134	19q13.43	16	cancer	Cervix	R269	Kamal	2020	BJC	NGS	ZNF667
580	14.2211	14q21.1	18	cancer	Cervix	R27	Kamal	2020	BJC	NGS	MIPOL1/TTC6
581	5.2143	5q14.3	16	cancer	Cervix	R270	Kamal	2020	BJC	NGS	LYSMD3
	5.2143	5q14.3	16	cancer	Cervix	R270	Kamal	2020	BJC	NGS	POLR3G
582	10.113	10p13	16	cancer	Cervix	R271	Kamal	2020	BJC	NGS	FRMD4A
583	23.2131	Xq13.1	45	cancer	Cervix	R272	Kamal	2020	BJC	NGS	HDAC8
584	17.2231	17q23.1	45	cancer	Cervix	R274	Kamal	2020	BJC	NGS	VMP1
585	8.2223	8q22.3	31	cancer	Cervix	R275	Kamal	2020	BJC	NGS	RIMS2
586	22.2131	22q13.1	16	cancer	Cervix	R276	Kamal	2020	BJC	NGS	SUN2
587	9.2333	9q33.3	16	cancer	Cervix	R277	Kamal	2020	BJC	NGS	LRSAM1
	17.2242	17q24.2	16	cancer	Cervix	R277	Kamal	2020	BJC	NGS	NOL11
	16.1133	16p13.3	16	cancer	Cervix	R277	Kamal	2020	BJC	NGS	RBFOX1
588	20.1121	20p12.1	16	cancer	Cervix	R278	Kamal	2020	BJC	NGS	MACROD2
	9.2333	9q33.3	16	cancer	Cervix	R278	Kamal	2020	BJC	NGS	NR5A1
589	7.2323	7q32.3	16	cancer	Cervix	R279	Kamal	2020	BJC	NGS	LINC-PINT
590	19.1133	19p13.3	16	cancer	Cervix	R28	Kamal	2020	BJC	NGS	NFIC
591	2.2312	2q31.2	16	cancer	Cervix	R283	Kamal	2020	BJC	NGS	AGPS
	10.2253	10q25.3	16	cancer	Cervix	R283	Kamal	2020	BJC	NGS	ATRNL1
	14.2322	14q32.2	16	cancer	Cervix	R283	Kamal	2020	BMJ	NGS	DEGS2
	10.2253	10q25.3	16	cancer	Cervix	R283	Kamal	2020	BJC	NGS	GFRA1
	2.2312	2q31.2	16	cancer	Cervix	R283	Kamal	2020	BJC	NGS	NFE2L2
592	6.1241	6p24.1	18	cancer	Cervix	R285	Kamal	2020	BJC	NGS	HIVEP1
593	5.2331	5q33.1	16	cancer	Cervix	R286	Kamal	2020	BJC	NGS	SPARC
594	8.1213	8p21.3	16	cancer	Cervix	R288	Kamal	2020	BJC	NGS	TNFRSF110B
595	8.11121	8p11.21	16	cancer	H&N	R290	Mainguené	2022	Mol Oncol	NGS	IKBKB
596	20.1121	20p12.1	16	cancer	H&N	R294	Mainguné	2022	Mol Oncol	NGS	MACROD2
597	3.1121	3p12.1	35	cancer	H&N	R295	Mainguené	2022	Mol Oncol	NGS	CADM2
	9.1241	9p24.1	35	cancer	H&N	R295	Mainguené	2022	Mol Oncol	NGS	CD274
	22.2133	22q13.31	35	cancer	H&N	R295	Mainguené	2022	Mol Oncol	NGS	EFCAB6	PNPLA3
598	9.1241	9p24.1	33	cancer	H&N	R299	Mainguené	2022	Mol Oncol	NGS	PLGRKT
599	14.212	14q12	18	cancer	Cervix	R30	Kamal	2020	BMJ	NGS	AKAP6
600	5.2311	5q31.1	16	cancer	H&N	R303	Mainguené	2022	Mol Oncol	NGS	C5Orf66	LOC100996485
	8.2243	8q24.3	16	cancer	H&N	R303	Mainguené	2022	Mol Oncol	NGS	MROH5
601	7.1123	7p12.3	35	cancer	H&N	R306	Mainguené	2022	Mol Oncol	NGS	ABCA13
602	14.2241	14q24.1	16	cancer	Cervix	R31	Kamal	2020	BJC	NGS	RAD51B		68932393
603	24.2112	Yq11.21	16	cancer	H&N	R310	Mainguené	2022	Mol Oncol	NGS	DDX3Y
604	1.1211	1p21.1	16	cancer	H&N	R314	Mainguené	2022	Mol Oncol	NGS	RASAL2	NFE2L2
605	11.2241	11q24.1	16	cancer	H&N	R320	Mainguené	2022	Mol Oncol	NGS	MIR100HG
	2.115	2p15	16	cancer	H&N	R320	Mainguené	2022	Mol Oncol	NGS	WDPCP
606	1.241	1q41	16	cancer	H&N	R321	Mainguené	2022	Mol Oncol	NGS	SUSD4
607	12.1133	12p13.33	16	cancer	H&N	R322	Mainguené	2022	Mol Oncol	NGS	ADOPOR2
	12.2242	12q24.23	16	cancer	H&N	R322	Mainguené	2022	Mol Oncol	NGS	HSPB8
608	6.1123	6p12.3	16	cancer	H&N	R322	Mainguené	2022	Mol Oncol	NGS	TNFRSF21
609	1.2242	1q24.2	39	cancer	Cervix	R323	Kamal	2020	BJC	NGS	NME7
610	5.11533	5p15.33	16	cancer	Cervix	R324	Kamal	2020	BJC	NGS	SLC6A19
	5.11533	5p15.33	16	cancer	Cervix	R324	Kamal	2020	BJC	NGS	TERT
611	15.2222	15q22.2	16	cancer	Cervix	R325	Kamal	2020	BJC	NGS	FAM8IA
	23.2213	Xq21.32	16	cancer	Cervix	R325	Kamal	2020	BJC	NGS	PCDH11X
612	1.1313	1p31.3	18	cancer	Cervix	R328	Kamal	2020	BJC	NGS	PDE4B
613	23.2263	Xq26.3	16	cancer	Cervix	R33	Kamal	2020	BMJ	NGS	ARHGEF6
	2.124	2p24	16	cancer	Cervix	R33	Kamal	2020	BMJ	NGS	C2Orf43
	23.2213	Xq21.33	16	cancer	Cervix	R33	Kamal	2020	BJC	NGS	DIAPH2
	8.2121	8q12.1	16	cancer	Cervix	R33	Kamal	2020	BJC	NGS	LYN
	1.2322	1q32.2	16	cancer	Cervix	R33	Kamal	2020	BJC	NGS	NUAK2
	10.2112	10q11.23	16	cancer	Cervix	R33	Kamal	2020	BJC	NGS	PARG
	9.1241	9p24.1	16	cancer	Cervix	R33	Kamal	2020	BJC	NGS	PLGRKT
614	8.112	8p12	18	cancer	Cervix	R333	Kamal	2020	BJC	NGS	NRG1
615	3.228	3q28	16	cancer	Cervix	R338	Kamal	2020	BJC	NGS	TP63	189498697
616	7.23132	7q31.32	16	cancer	Cervix	R340	Kamal	2020	BJC	NGS	FEZF1-AS1
617	11.2222	11q22.2	16	cancer	Cervix	R341	Kamal	2020	BJC	NGS	MMP12
618	16.2221	16q22.1	82	cancer	Cervix	R342	Kamal	2020	BJC	NGS	B3GNT9
	16.2221	16q22.1	82	cancer	Cervix	R342	Kamal	2020	BJC	NGS	C160Orf70
	16.1121	16p12.1	82	cancer	Cervix	R342	Kamal	2020	BJC	NGS	GSG1L
	16.2221	16q22.1	82	cancer	Cervix	R342	Kamal	2020	BJC	NGS	HSF4
	16.2221	16q22.1	82	cancer	Cervix	R342	Kamal	2020	BJC	NGS	SLC9A5
	16.1133	16p13.3	82	cancer	Cervix	R342	Kamal	2020	BJC	NGS	SNX29
619	1.2243	1q24.3	45	cancer	Cervix	R344	Kamal	2020	BJC	NGS	MYOC
	1.2243	1q24.3	45	cancer	Cervix	R344	Kamal	2020	BJC	NGS	PRRC2C
620	14.2322	14q32.2	16	cancer	Cervix	R347	Kamal	2020	BMJ	NGS	BCL11B
621	19.1132	19p13.2	16	cancer	Cervix	R348	Kamal	2020	BJC	NGS	INSR
	8.22413	8q24.13	16	cancer	Cervix	R348	Kamal	2020	BJC	NGS	NSMCE2
622	19.2134	19q13.42	16	cancer	Cervix	R349	Kamal	2020	BJC	NGS	KMT5C
623	10.1151	10p15.1	16	cancer	Cervix	R35	Kamal	2020	BJC	NGS	AKR1C3
624	9.2331	9q33.1	45	cancer	Cervix	R351	Kamal	2020	BJC	NGS	TNC
625	1.1322	1p32.2	16	cancer	Cervix	R363	Kamal	2020	BJC	NGS	DAB1
626	4.2341	4q34.1	16	cancer	Cervix	R365	Kamal	2020	BJC	NGS	GALNTL6
627	2.2221	2q22.1	18	cancer	Cervix	R366	Kamal	2020	BJC	NGS	LRP1B
628	152213	15q21.3	45	cancer	Cervix	R367	Kamal	2020	BJC	NGS	LIPC
629	3.228	3q28	58	cancer	Cervix	R373	Kamal	2020	BJC	NGS	TP63	189594960
630	14.2211	14q21.1	16	cancer	Cervix	R377	Kamal	2020	BJC	NGS	MIPOL1/TTC6
	11.1154	11p15.4	16	cancer	Cervix	R377	Kamal	2020	BJC	NGS	SBF2
631	16.2241	16q24.1	67	cancer	Cervix	R378	Kamal	2020	BJC	NGS	GSE1
632	9.22113	9q21.13	16	cancer	Cervix	R379	Kamal	2020	BJC	NGS	PCSK5
633	14.2241	14q24.1	33	cancer	Cervix	R38	Kamal	2020	BJC	NGS	RAD51B		68674773
634	23.224	Xq24	16	cancer	Cervix	R381	Kamal	2020	BJC	NGS	CUL4B
635	7.1223	7p22.3	16	cancer	Cervix	R388	Kamal	2020	BJC	NGS	CHST2
	20.2112	20q11.21	16	cancer	Cervix	R388	Kamal	2020	BJC	NGS	SNTA1
636	9.2311	9q31.1	16	cancer	Cervix	R39	Kamal	2020	BJC	NGS	ANTD3-TME1
637	9.1241	9p24.1	16	cancer	Cervix	R39	Kamal	2020	BJC	NGS	SPATA6L
638	3.2271	3q27.1	16	cancer	Cervix	R392	Kamal	2020	BJC	NGS	EPHB3
639	3.1143	3p14.3	16	cancer	Cervix	R393	Kamal	2020	BMJ	NGS	CCDC66
640	4.22121	4q21.21	16	cancer	Cervix	R41	Kamal	2020	BJC	NGS	ANTXR2
	10.2253	10q25.3	16	cancer	Cervix	R41	Kamal	2020	BJC	NGS	ATRNL1
	4.2211	4q21.1	16	cancer	Cervix	R41	Kamal	2020	BJC	NGS	C4Orf22
	6.22231	6q22.31	16	cancer	Cervix	R41	Kamal	2020	BMJ	NGS	C6Orf170
	10.114	10p14	16	cancer	Cervix	R41	Kamal	2020	BJC	NGS	CELF2
	7.1151	7p15.1	16	cancer	Cervix	R41	Kamal	2020	BJC	NGS	CREB5
	2.2332	2q33.2	16	cancer	Cervix	R41	Kamal	2020	BJC	NGS	NBEAL1
	4.2311	4q31.1	16	cancer	Cervix	R41	Kamal	2020	BJC	NGS	RAB33B
	6.2232	6q23.2	16	cancer	Cervix	R41	Kamal	2020	BJC	NGS	SGK1
	23.224	Xq24	16	cancer	Cervix	R41	Kamal	2020	BJC	NGS	UBE2A
	18.2211	18q21.1	16	cancer	Cervix	R41	Kamal	2020	BJC	NGS	ZBTB7C
	18.2213	18q21.32	16	cancer	Cervix	R41	Kamal	2020	BJC	NGS	ZNF532
641	6.213	6q13	18	cancer	Cervix	R45	Kamal	2020	BJC	NGS	KCNQ5
642	5.232	5q32	45	cancer	Cervix	R46	Kamal	2020	BJC	NGS	SPINK5
643	19.2132	19,q13.2	18	cancer	Cervix	R47	Kamal	2020	BMJ	NGS	CEACAM6
	8.21121	8q11.21	18	cancer	Cervix	R47	Kamal	2020	BJC	NGS	KIAA0146
644	10.2233	10q23.31	16	cancer	Cervix	R48	Kamal	2020	BJC	NGS	PTEN
	9.123	9p23	16	cancer	Cervix	R48	Kamal	2020	BJC	NGS	PTPRD
645	19.1132	19p13.2	16	cancer	Cervix	R49	Kamal	2020	BJC	NGS	HNRNPM
	19.1132	19p13.2	16	cancer	Cervix	R49	Kamal	2020	BJC	NGS	MARCH2
	12.2131	12q13.11	16	cancer	Cervix	R49	Kamal	2020	BJC	NGS	OC10028879
	10.1151	10p15.1	16	cancer	Cervix	R49	Kamal	2020	BJC	NGS	PFKFB3
646	7.1223	7p22.3	16	cancer	Cervix	R51	Kamal	2020	BJC	NGS	C7Orf50
647	11.2243	11q24.3	16	cancer	Cervix	R52	Kamal	2020	BJC	NGS	NFRKB
648	17.2253	17q25.3	16	cancer	H&N	R548	Mainguené	2022	Mol Oncol	NGS	TBCD	ZNF750
649	3.2272	3q27.2	16	cancer	Cervix	R55	Kamal	2020	BJC	NGS	EHHADH
	3.22532	3q25.32	16	cancer	Cervix	R55	Kamal	2020	BJC	NGS	RSRC1
650	17.2213	17q21.31	16	cancer	H&N	R550	Manguené	2022	Mol Oncol	NGS	C17Orf104	DBF4B
	17.212	17q12	16	cancer	H&N	R550	Mainguené	2022	Mol Oncol	NGS	LHX1-DT
651	1.244	1q44	70	cancer	Cervix	R57	Kamal	2020	BJC	NGS	SMYD3
	1.244	1q44	70	cancer	Cervix	R57	Kamal	2020	BJC	NGS	SMYD4
652	1.2311	1q32.1	18	cancer	Cervix	R58	Kamal	2020	BMJ	NGS	CAMSAP2
	1.2323	1q32.3	18	cancer	Cervix	R58	Kamal	2020	BJC	NGS	SMYD2
653	5.2312	5q31.2	16	cancer	Cervix	R59	Kamal	2020	BJC	NGS	CXXC5
	3.1223	3p22.3	33	cancer	Cervix	R59	Kamal	2020	BJC	NGS	STAC
	5.2334	5q33.4	39	cancer	Cervix	R59	Kamal	2020	BJC	NGS	TENM2
654	12.2131	12q13.13	16	cancer	H&N	R592	Mainguené	2022	Mol Oncol	NGS	ATF7
	17.2243	17q24.3	16	cancer	H&N	R592	Mainguené	2022	Mol Oncol	NGS	LINC00511
	2.12423	2p24.23	16	cancer	H&N	R592	Mainguené	2022	Mol Oncol	NGS	PMSD14
655	13.2221	13q22.1	16	cancer	H&N	R593	Mainguené	2022	Mol Oncol	NGS	KLF5
656	6.22231	6q22.31	16	cancer	H&N	R595	Mainguené	2022	Mol Oncol	NGS	C6Orf170
	15.2131	15q13.1	16	cancer	H&N	R595	Mainguené	2022	Mol Oncol	NGS	OCA2
	17.2212	17q21.2	16	cancer	H&N	R595	Mainguené	2022	Mol Oncol	NGS	TNS4
657	14.2232	14q23.2	16	cancer	H&N	R596	Mainguené	2022	Mol Oncol	NGS	SYT16
658	11.1154	11p15.4	16	cancer	H&N	R607	Mainguené	2022	Mol Oncol	NGS	CYB5R2
659	14.2232	14q23.2	16	cancer	H&N	R608	Mainguené	2022	Mol Oncol	NGS	ZFP36L1
660	14.2313	14q31.3	16	cancer	H&N	R617	Mainguené	2022	Mol Oncol	NGS	LINCO2328
661	1.222	1q22	16	cancer	H&N	R619	Mainguené	2022	Mol Oncol	NGS	DAP3
	8.2222	8q22.2	16	cancer	H&N	R619	Mainguené	2022	Mol Oncol	NGS	MTERFD1
	8.22421	8q24.21	16	cancer	H&N	R619	Mainguené	2022	Mol Oncol	NGS	PVT1
	4.2321	4q32.1	16	cancer	H&N	R619	Mainguené	2022	Mol Oncol	NGS	RAPGEF2
662	9.22233	9q22.33	16	cancer	H&N	R620	Mainguené	2022	Mol Oncol	NGS	PTCSC2
663	3.12131	3p21.31	33	cancer	H&N	R621	Mainguené	2022	Mol Oncol	NGS	QRICH1	CCDC36
664	12.222	12q22.2	16	cancer	H&N	R623	Mainguené	2022	Mol Oncol	NGS	LOC643339
	7.22111	7q21.11	16	cancer	H&N	R623	Mainguené	2022	Mol Oncol	NGS	MAGI2
665	7.2311	7q31.1	16	cancer	H&N	R624	Mainguené	2022	Mol Oncol	NGS	IMMP2L
666	11.2134	11q13.4	16	cancer	H&N	R629	Mainguené	2022	Mol Oncol	NGS	SHANK2
	9.22111	9q21.11	16	cancer	H&N	R629	Mainguené	2022	Mol Oncol	NGS	TJP2
	19.1133	19p13.3	16	cancer	H&N	R629	Mainguené	2022	Mol Oncol	NGS	TJP3
	8.2222	8q22.2	16	cancer	H&N	R629	Mainguené	2022	Mol Oncol	NGS	VPS13B
667	22.2112	22q11.22	16	cancer	H&N	R631	Mainguené	2022	Mol Oncol	NGS	TOP3B
668	7.1143	7p14.3	16	cancer	H&N	R632	Mainguené	2022	Mol Oncol	NGS	AVL9	RP9P
	20.1121	20p12.1	16	cancer	H&N	R632	Mainguené	2022	Mol Oncol	NGS	MACROD2
	16.1122	16p12.2	16	cancer	H&N	R632	Mainguené	2022	Mol Oncol	NGS	SCNNB1
669	9.2312	9q31.2	26	cancer	H&N	R633	Mainguené	2022	Mol Oncol	NGS	ACTL7B
670	10.1151	10p15.1	16	cancer	Cervix	R635	Mainguené	2022	Mol Oncol	NGS	AKR1E2	KLF6
	4.1163	4p16.3	16	cancer	H&N	R635	Mainguené	2022	Mol Oncol	NGS	FGFR3	TACC3
671	22.2123	22q12.3	16	cancer	H&N	R636	Mainguené	2022	Mol Oncol	NGS	LARGE	APOL5/APOL6
672	14.2212	14q21.2	16	cancer	H&N	R646	Mainguené	2022	Mol Oncol	NGS	MIS18BP1	LINC00871
673	19.2134	19q13.43	16	cancer	H&N	R647	Mainguené	2022	Mol Oncol	NGS	MZF1
674	23.1221	Xp22.12	16	cancer	H&N	R648	Mainguené	2022	Mol Oncol	NGS	SH3KBP1
675	21.2112	21q11.2	18	cancer	Cervix	R65	Kamal	2020	BJC	NGS	NRIP1
676	9.1241	9p24.1	16	cancer	H&N	R650	Mainguené	2022	Mol Oncol	NGS	PDCD1LG2
677	22.2111	22q11.1	16	cancer	H&N	R653	Mainguené	2022	Mol Oncol	NGS	CECR1	CECR2
678	8.22421	8q24.21	16	cancer	H&N	R654	Mainguené	2022	Mol Oncol	NGS	PVT1
679	6.215	6q15	16	cancer	H&N	R657	Mainguené	2022	Mol Oncol	NGS	BACH2	MAP3K7
	11.1154	11p15.4	16	cancer	H&N	R657	Mainguené	2022	Mol Oncol	NGS	OR51S1
680	11.1141	11p14.1	16	cancer	H&N	R658	Mainguené	2022	Mol Oncol	NGS	BBOX1	CCDC34
681	10.2241	10q24.1	16	cancer	H&N	R659	Mainguené	2022	Mol Oncol	NGS	ARHGAP19
682	7.2361	7q36.1	16	cancer	Cervix	R66	Kamal	2020	BJC	NGS	GALNTL5
	20.1121	20p12.1	16	cancer	Cervix	R66	Kamal	2020	BJC	NGS	MACROD2	meme cas ?
	3.22631	3q26.31	18	cancer	Cervix	R66	Kamal	2020	BJC	NGS	NAALADL2
683	7.2361	7q36.1	16	cancer	H&N	R660	Mainguené	2022	Mol Oncol	NGS	DPP6	ACTRC3
	23.1113	Xp11.3	16	cancer	H&N	R660	Mainguené	2022	Mol Oncol	NGS	MAOB
684	19.1133	19p13.3	16	cancer	H&N	R661	Mainguené	2022	Mol Oncol	NGS	MOB3A
	8.22421	8q24.21	16	cancer	H&N	R661	Mainguené	2022	Mol Oncol	NGS	PCAT	JX003871
	8.22421	8q24.21	16	cancer	H&N	R661	Mainguené	2022	Mol Oncol	NGS	PVT1	MYC
685	12.2233	12q23.3	16	cancer	Cervix	R67	Kamal	2020	BMJ	NGS	BTBD11
	12.2233	12q23.3	16	cancer	Cervix	R67	Kamal	2020	BMJ	NGS	CHST11
	17.212	17q12	16	cancer	Cervix	R67	Kamal	2020	BJC	NGS	ERBB2
	17.212	17q12	16	cancer	Cervix	R67	Kamal	2020	BJC	NGS	PGAP3
	16.2231	16q23.1	16	cancer	Cervix	R67	Kamal	2020	BJC	NGS	WWOX
686	2.2142	2q14.2	16	cancer	Cervix	R68	Kamal	2020	BMJ	NGS	EN1
687	3.2262	3q26.2	16	cancer	Cervix	R69	Kamal	2020	BJC	NGS	MECOM
688	20.1121	20p12.1	16	cancer	Cervix	R71	Kamal	2020	BJC	NGS	MACROD2
	19.2134	19q13.43	16	cancer	Cervix	R71	Kamal	2020	BJC	NGS	ZNF8
	19.2134	19q13.43	16	cancer	Cervix	R71	Kamal	2020	BJC	NGS	ZNF9
689	3.1143	3p14.3	16	cancer	Cervix	R72	Kamal	2020	BJC	NGS	ERC2
	20.1121	20p12.1	16	cancer	Cervix	R72	Kamal	2020	BJC	NGS	MACROD2
	3.1143	3p14.3	16	cancer	Cervix	R72	Kamal	2020	BJC	NGS	WNT5A
690	13.2142	13q14.2	33	cancer	Cervix	R77	Kamal	2020	BMJ	NGS	DLEU1
	20.1121	20p12.1	33	cancer	Cervix	R77	Kamal	2020	BJC	NGS	MACROD2
691	17.222	17q22	16	cancer	Cervix	R78	Kamal	2020	BJC	NGS	SRFS1
692	20.113	20p13	16	cancer	Cervix	R79	Kamal	2020	BJC	NGS	GFRA4
	20.2132	20q13.2	16	cancer	Cervix	R79	Kamal	2020	BJC	NGS	TSHZ2
693	7.22113	7q21.13	33	cancer	Cervix	R83	Kamal	2020	BJC	NGS	CFAP69
	7.22113	7q21.13	33	cancer	Cervix	R83	Kamal	2020	BJC	NGS	STEAP2
694	2.235	2q35	16	cancer	Cervix	R85	Kamal	2020	BJC	NGS	USP37
695	8.1211	8p21.1	16	cancer	Cervix	R88	Kamal	2020	BJC	NGS	CCDC25
	8.1211	8p21.1	16	cancer	Cervix	R88	Kamal	2020	BJC	NGS	SCARA3
696	1.1311	1p31.1	16	cancer	Cervix	R89	Kamal	2020	BMJ	NGS	AK5
	9.23413	9q34.13	16	cancer	Cervix	R89	Kamal	2020	BMJ	NGS	CFAP77
	8.2132	8q13.2	16	cancer	Cervix	R89	Kamal	2020	BJC	NGS	CPA6
	1.1213	1p21.3	16	cancer	Cervix	R89	Kamal	2020	BMJ	NGS	DPYD
	16.1121	16p12.1	16	cancer	Cervix	R89	kamal	2020	BJC	NGS	HST3ST4
	8.1211	8p21.1	16	cancer	Cervix	R89	Kamal	2020	BJC	NGS	NUGGC
	5.2121	5q12.1	16	cancer	Cervix	R89	Kamal	2020	BJC	NGS	PDE4D
	9.22132	9q21.32	16	cancer	Cervix	R89	Kamal	2020	BJC	NGS	RMI1
	5.2351	5q35.1	16	cancer	Cervix	R89	Kamal	2020	BJC	NGS	SLIT3
697	6.1211	6p21.1	31	cancer	Cervix	R91	Kamal	2020	BJC	NGS	TFEB
698	15.2223	15q22.33	31	cancer	Cervix	R92	Kamal	2020	BJC	NGS	SMAD3
699	10.1152	10p15.2	16	cancer	Cervix	R93	Kamal	2020	BJC	NGS	OC10537636
700	3.1253	3p25.3	18	cancer	Cervix	R94	Kamal	2020	BJC	NGS	HRH1
701	12.224	12q24.22	58	cancer	Cervix	Sample 1	Chaiwongkot	2013	J Virol Meth	APOT	DYNLL1
702	18.212	18q12	58		Cervix	Sample 2	Chaiwongkot	2013	J Virol Meth	APOT	RPL17P45
703	4.221	4q21	58		Cervix	Sample 3	Chaiwongkot	2013	J Virol Meth	APOT	IL8?
704	8.224	8q24	16	SCC	Vulve	SCC	Nakanishi	2009	Clin & Exp Dermatology	APOT	MYC
705	9.2333	9q33.3	16	CIN3	Cervix	Subject 1	Bodelon	2016	Carcinogenesis	NGS	NR5A1
	10.2242	10q24.2	16	CIN3	Cervix	Subject 1	Bodelon	2016	Carcinogenesis	NGS	PI4K2A
	3.1112	3p11.2	16	CIN3	Cervix	Subject 1	Bodelon	2016	Carcinogenesis	NGS
706	4.22123	4q21.23	16	CIN3	Cervix	Subject 12	Bodelon	2016	Carcinogenesis	NGS
707	22.2112	22q11.23	16	CIN3	Cervix	Subject 15	Bodelon	2016	Carcinogenesis	APOT	CES5AP1
708	20.2131	20q13.13	16	CIN3	Cervix	Subject 16	Bodelon	2016	Carcinogenesis	APOT
709	15.223	15q23	16	cancer	Cervix	Subject 18	Bodelon	2016	Carcinogenesis	NGS	MYO9A	SENP8
710	7.21123	7q11.23	16	cancer	Cervix	Subject 18	Bodelon	2016	carcinogenesis	NGS	PMS2PS
711	3.126	3p26	16	cancer	Cervix	Subject 20	Bodelon	2016	Carcinogenesis	NGS	ITPR1
712	13.2221	13q22.1	16	cancer	Cervix	Subject 21	Bodelon	2016	Carcinogenesis	APOT
713	14.2322	14q32.2	16	cancer	Cervix	Subject 23	Bodelon	2016	Carcinogenesis	NGS	BCL11B
714	8.2221	8q22.1	16	cancer	Cervix	Subject 24	Bodelon	2016	Carcinogenesis	NGS	NDUFAF6
715	15.2253	15q25.3	16	cancer	Cervix	Subject 25	Bodelon	2016	Carcinogenesis	NGS	AKAP13
716	21,222.3	21q22.3	16	cancer	Cervix	Subject 26	Bodelon	2016	Carcinogenesis	NGS	RIP4K	PRDM15
717	6.1252	6p25.2	16	cancer	Cervix	Subject 27	Bodelon	2016	Carcinogenesis	NGS	SERPINB9
718	8.22421	8q24.21	16	cancer	Cervix	Subject 29	Bodelon	2016	Carcinogenesis	NGS	MYC
719	9.1242	9p24.2	16	cancer	Cervix	Subject 30	Bodelon	2016	Carcinogenesis	NGS	RFX3
720	10.114	10p14	16	cancer	Cervix	Subject 31	Bodelon	2016	Carcinogenesis	NGS
721	1.1342	1p34.2	16	cancer	Cervix	Subject 33	Bodelon	2016	Carcinogenesis	NGS	PTPRF
722	9,234.3	9q34.3	16	cancer	Cervix	Subject 35	Bodelon	2016	Carcinogenesis	APOT
723	19.2132	19q13.2	16	cancer	Cervix	Subject 37	Bodelon	2016	Carcinogenesis	NGS	SPTBN4	SHKBP1	LTBP4
724	11.2131	11q13.1	16	cancer	Cervix	Subject 38	Bodelon	2016	Carcinogenesis	NGS	RBM14	RBM4
725	15.2242	15q24.2	16	CIN3	Cervix	Subject 5	Bodelon	2016	Carcinogenesis	APOT	ETFA
726	1.2322	1q32.2	16	CIN3	Cervix	Subject 6	Bodelon	2016	Carcinogenesis	NGS
727	3.228	3q28	16	CIN3	Cervix	Subject 8	Bodelon	2016	Carcinogenesis	NGS	TP63	191025132	MIR944
728	15.2242	15q24.2	16	CIN3	Cervix	Subject 9	Bodelon	2016	Carcinogenesis	NGS	ETFA
729	1.13622	1p36.22	16	CIN3	Cervix	Suject 1	Bodelon	2016	Carcinogenesis	NGS	CLSTN1
730	2.234	2q34	16	CIN3	Cervix	T04	Ziegert	2003	Oncogene	APOT
731	3.227	3q27	16	CIN3	Cervix	T05	Ziegert	2003	Oncogene	APOT	EST
732	13.2141	13q14.11	16	cancer	H&N	T1	Lace	2011	J Virol	NGS	MTRF-1
733	2.222	2q22	16	cancer	Cervix	T1	Luft	2001	Int J Cancer	DIPS-PCR
734	20.1112	20p11.21	16	SCC	Cervix	T1013	Kraus	2008	Cancer Res	APOT	hmm65227
735	4.223	4q23	16	cancer	Cervix	T1051	Kraus	2008	Cancer Res	APOT	chr4_782.1
736	8.111	8p11	18	cancer	Cervix	T12	Luft	2001	Int J Cancer	DIPS-PCR
737	4.115	4p15	18	cancer	Cervix	T13	Ziegert	2003	Oncogene	APOT	PCDH7
738	7.231	7q31	16	cancer	Cervix	T13	Luft	2001	Int J Cancer	DIPS-PCR
739	3.121	3p21	16	cancer	Cervix	T14	Ziegert	2003	Oncogene	APOT	MAPA
740	16.224	16q24	16	cancer	Cervix	T15	Ziegert	2003	Oncogene	APOT	CDH13
741	14.224	14q24	16	cancer	Cervix	T15	Luft	2001	Int J Cancer	DIPS-PCR
742	8.2233	8q23.3	16	cancer	Cervix	T1509	Xu	2013	PLOS One	NGS	CSMD3
	9.1133	9p13.3	16	cancer	Cervix	T1509	Xu	2013	PLOS One	NGS	UBAP2
743	17.2212	17q21.2	45	SCC	Cervix	T1543	Kraus	2008	Cancer Res	APOT	chr17_706.1
744	17.2232	17q23.2	16	cancer	Cervix	T1686	Xu	2013	PLOS One	NGS	VMP1
745	1.241	1q41	16	cancer	Cervix	T17	Luft	2001	Int J Cancer	DIPS-PCR
746	2.222	2q22	16	cancer	Cervix	T17	Ziegert	2003	Oncogene	APOT
747	15.2253	15q25.3	18	SCC	Cervix	T1729	Kraus	2008	Cancer Res	APOT	AGBL1
748	2.1243	2p24.3	16	SCC	Cervix	T174	Kraus	2008	Cancer Res	APOT	hmm88622
749	6.124	6p24	16	cancer	Cervix	T18	Ziegert	2003	Oncogene	APOT	EST
750	3.2262	3q26.2	16	cancer	Cervix	T18	Xu	2013	PLOS One	NGS	MECOM
751	15.2222	15q22.2	16	cancer	Cervix	T182e	Schmitz	2012	IJC	APOT	LIPC (loss)
752	1.13611	1p36.11	16	SCC	Cervix	T183	Kraus	2008	Cancer Res	APOT	C1orf201
753	9.1212	9p21.2	16	cancer	Cervix	T186e	Xu	2013	PLOS One	NGS	IFT174
	19.211	19q11	16	cancer	Cervix	T186e	Xu	2013	PLOS One	NGS	URI1
754	2.2331	2q33.1	16	cancer	Cervix	T1875	Xu	2013	PLOS One	NGS	ORC2
755	2.221	2q22.1	16	cancer	Cervix	T19	Ziegert	2003	Oncogene	NGS	LRP1B
756	15.2213	15q21.3	16	cancer	Cervix	T1907	Schmitz	2012	IJC	APOT	LIPC
757	14.2232	14q23.2	16	cancer	Cervix	T1907U	Xu	2013	PLOS One	NGS	HIF1A
758	2.1251	2p25.1	18	SCC	Cervix	T1981	Kraus	2008	Cancer Res	APOT	CYS1
759	6.112	6p12	16	cancer	H&N	T2	Lace	2011	J Virol	NGS	HNRPA3 ?
760	8.224	8q24	18	cancer	Cervix	T20	Ziegert	2003	Oncogene	APOT
761	16.1131	16p13.13	16	cancer	Cervix	T2085	Xu	2013	PLOS One	NGS	BCAR4
	2.2231	2q23.1	16	cancer	Cervix	T2085	Xu	2013	PLOS One	NGS	MBD5
762	9.22113	9q21.13	33	SCC	Cervix	T209	Kraus	2008	Cancer Res	APOT	chr9.76.001a
763	6.123	6p23	18	cancer	Cervix	T21	Ziegert	2003	Oncogene	APOT	Hs633338
764	17.2212	17q21.2	16	SCC	Cervix	T2147	Kraus	2008	Cancer Res	APOT	EIF1
765	9.234	9q34	18	cancer	Cervix	T22	Ziegert	2003	Oncogene	APOT
766	13.2222	13q22.2	16	cancer	Cervix	T2209	Xu	2013	PLOS One	NGS	KLF12
767	15.2211	15q21.1	18	SCC	Cervix	T221	Kraus	2008	Cancer Res	APOT	sehe
768	4.2352	4q35.2	16	cancer	Cervix	T2231	Xu	2013	PLOS One	NGS	DUX4L2
769	9.122	9p22	16	cancer	Cervix	T23	Ziegert	2003	Oncogene	APOT	NF1B
770	2.2363	2q36.3	16	cancer	Cervix	T2317	Xu	2013	PLOS One	NGS	PID1
	15.2261	15q26.1	16	cancer	Cervix	T2317	Xu	2013	PLOS One	NGS	SEMA4B
771	1.136	1p36.22	16	cancer	Cervix	T2319	Schmitz	2012	IJC	APOT	CASZ1 (loss)
772	4.11531	4p15.31	18	SCC	Cervix	T2341	Kraus	2008	Cancer Res	APOT	KCNIP4
773	23.1223	Xp22.31	16	cancer	Cervix	T2349	Xu	2013	PLOS One	NGS	STS
774	17.223	17q23	18	cancer	Cervix	T24	Ziegert	2003	Oncogene	DIPS	VMP1
775	7.122	7p22	16	cancer	Cervix	T25	Ziegert	2003	Oncogene	DIPS	DGKB
776	19.1133	19p13.3	16	cancer	Cervix	T2548	Xu	2013	PLOS One	NGS	ARID3A	MOB3A
	20.2112	20q11.22	16	cancer	Cervix	T2548	Xu	2013	PLOS One	NGS	CBFA2T2
	3.1142	3p14.2	16	cancer	Cervix	T2548	Xu	2013	PLOS One	NGS	FHIT
	20.1121	20p12.1	16	cancer	Cervix	T2548	Xu	2013	PLOS One	NGS	MACROD2
777	5.11532	5p15.32	16	cancer	Cervix	T2592	Xu	2013	PLOS One	NGS
778	8.2121	8q12.1	16	SCC	Cervix	T2594	Kraus	2008	Cancer Res	APOT	c8orf72
779	17.223	17q23	18	cancer	Cervix	T26	Ziegert	2003	Oncogene	APOT
780	23.122	Xp22	16	cancer	Vagin	T27	Ziegert	2003	Oncogene	APOT	MGC4825
781	17.2213	17q21.31	16	cancer	Cervix	T2707	Xu	2013	PLOS One	NGS	STARD3	ERBB2	erreur de loc chr?
782	17.2231	17q23.1	18	cancer	Cervix	T2723	Schmitz	2012	IJC	APOT	TMEM49
783	4.221	4q21	16	cancer	Vagin	T28	Ziegert	2003	Oncogene	DIPS	BIKE
784	2.2223	2q22.3	16	cancer	Cervix	T2882	Xu	2013	PLOS One	NGS
785	8.224	8q24	18	cancer	Cervix	T29	Ziegert	2003	Oncogene	APOT	FLJ12428
786	19.1131	19p13.11	16	cancer	Cervix	T2967	Xu	2013	PLOS One	NGS	GATA2D2
	19.1131	19p13.11	16	cancer	Cervix	T2967	Schmitz	2012	IJC	APOT	GATAD2A
787	13.2142	13q14.2	16	cancer	H&N	T3	Lace	2011	J Virol	NGS	RB1
788	17.223	17q23	18	cancer	Cervix	T30	Ziegert	2003	Oncogene	APOT	EST
789	3.227	3q27	16	cancer	Cervix	T31	Ziegert	2003	Oncogene	APOT
790	8.22421	8q24.21	16	SCC	Cervix	T315	Kraus	2008	Cancer Res	APOT	hmm75097
791	1.242	1q42	18	cancer	Cervix	T32	Ziegert	2003	Oncogene	APOT	FLJ10359
792	17.2231	17q23.1	18	cancer	Cervix	T3231	Schmitz	2012	IJC	APOT	TMEM49
793	3.22633	3q26.33	16	cancer	Cervix	T3256	Xu	2013	PLOS One	NGS	ATP11B
	10.2242	10q24.2	16	cancer	Cervix	T3256	Xu	2013	PLOS One	NGS	LOXL4	PYROXD2
794	13.2221	13q22.1	16	SCC	Cervix	T3283	Kraus	2008	Cancer Res	APOT	NT_02524.1096
795	6.215	6q15	33	SCC	Cervix	T3359	Kraus	2008	Cancer Res	APOT	chr6.92.003a
796	12.1132	12p13.2	16	cancer	Cervix	T3427	Xu	2013	PLOS One	NGS	BCL2L14
	17.1112	17p11.2	16	cancer	Cervix	T3427	Xu	2013	PLOS One	NGS	ULK2
797	6.1211	6p21.1	16	cancer	Cervix	T3576	Xu	2013	PLOS One	NGS	SLC29A1
798	13.2221	13q22.1	16	SCC	Cervix	T3706	Kraus	2008	Cancer Res	APOT	BG182794
799	4.2211	4q21.1	16	cancer	Cervix	T3719	Xu	2013	PLOS One	NGS	MRPL1
	2.1223	2p22.3	16	cancer	Cervix	T3719	Xu	2013	PLOS One	NGS
800	9.124	9p24	16	cancer	Cervix	T3817	Kraus	2008	Cancer Res	APOT	KIAA1432
	9.1241	9p24.1	16	SCC	Cervix	T3817	Kraus	2008	Cancer Res	APOT	KIAA1432
801	4.2133	4q13.3	16	cancer	Cervix	T3966	Xu	2013	PLOS One	NGS	IL8
802	2.234	2q34	16	cancer	Cervix	T3987	Xu	2013	PLOS One	NGS	ERBB4
803	4.223	4q23	16	cancer	Cervix	T4024	Xu	2013	PLOS One	NGS	C4orf17
	23.1221	Xp22.13	16	cancer	Cervix	T4024	Xu	2013	PLOS One	NGS	NHS
804	13.2221	13q22.1	16	cancer	Cervix	T4046	Xu	2013	PLOS One	NGS	KLF5
805	17.1131	17p13.1	18	cancer	Cervix	T4112	Schmitz	2012	IJC	APOT	FXR2
806	2.2242	2q24.2	18	SCC	Cervix	T4177	Kraus	2008	Cancer Res	APOT	ITGB6
807	20.1121	20p12.1	18	SCC	Cervix	T4251	Kraus	2008	Cancer Res	APOT	FLRT3
808	14.2112	14q11.2	18	SCC	Cervix	T4290	Kraus	2008	Cancer Res	APOT	C14ORF94
809	3.228	3q28	16	cancer	Cervix	T4426	Xu	2013	PLOS One	NGS	CLDN1
810	7.234	7q34	18	cancer	Cervix	T4502	Schmitz	2012	IJC	APOT	UBN2
811	9.123	9p23	16	cancer	Cervix	T4601	Xu	2013	PLOS One	NGS	LINC00583
812	19.1131	19p13.11	16	SCC	Cervix	T4653	Kraus	2008	Cancer Res	APOT	ZNF506
813	8.22421	8q24.21	16	SCC	Cervix	T4694	Kraus	2008	Cancer Res	APOT	bleyvyby
814	19.2132	19q13.2	16	SCC	Cervix	T4743	Kraus	2008	Cancer Res	APOT	CEACAM6
815	18.2122	18q12.2	16	cancer	Cervix	T4749	Xu	2013	PLOS One	NGS	FHOD3
	18.1113	18p11.32	16	cancer	Cervix	T4749	Xu	2013	PLOS One	NGS	LINC00470
816	9.2333	9q33.3	16	cancer	Cervix	T4793	Xu	2013	PLOS One	NGS	DENND1A
817	19.2131	19q13.11	18	SCC	Cervix	T4916	Kraus	2008	Cancer Res	APOT	LOC126235
818	6.22232	6q22.32	16	cancer	Cervix	T4977	Xu	2013	PLOS One	NGS	CENPW
	7.1151	7p15.1	16	cancer	Cervix	T4977	Xu	2013	PLOS One	NGS	CREB5
819	19.1133	19p13.3	18	cancer	Cervix	T4995	Schmitz	2012	IJC	APOT	CNN2
820	7.21121	7q11.21	16	cancer	Cervix	T5066	Xu	2013	PLOS One	NGS
	20.1122	20p12.2	16	cancer	Cervix	T5066	Xu	2013	PLOS One	NGS
821	8.22421	8q24.21	16	cancer	Cervix	T5189	Xu	2013	PLOS One	NGS	POUSF1B
	5.1141	5p14.1	16	cancer	Cervix	T5189	Xu	2013	PLOS One	NGS
	8.2232	8q23.2	16	cancer	Cervix	T5189	Xu	2013	PLOS One	NGS
822	3.12131	3p21.31	16	cancer	Cervix	T5234	Schmitz	2012	IJC	APOT	USP4
823	6.2232	6q23.2	16	cancer	H&N	T6	Lace	2011	J Virol	NGS	SGK1
824	7.231	7q31	18	cancer	Cervix	T6	Luft	2001	Int J Cancer	DIPS-PCR
825	1.1213	1p21.3	45	SCC	Cervix	T627	Kraus	2008	Cancer Res	APOT	AK024564
826	2.1131	2p13.1	16	cancer	Cervix	T644	Kraus	2008	Cancer Res	APOT	hmm230426
827	2.2221	2q22.1	45	SCC	Cervix	T654	Kraus	2008	Cancer Res	APOT	LRP1B
828	23.1221	Xp22.11	16	cancer	Cervix	T841	Xu	2013	PLOS One	NGS	FAM48B2
	13.2222	13q22.2	16	cancer	Cervix	T841	Xu	2013	PLOS One	NGS	KLF12
	13.2221	13q22.1	16	cancer	Cervix	T841	Xu	2013	PLOS One	NGS	KLF5
	2.2333	2q33.3	16	cancer	Cervix	T841	Xu	2013	PLOS One	NGS	PARD3B
	23.1221	Xp22.12	16	cancer	Cervix	T841	Xu	2013	PLOS One	NGS	PDK3
829	2.1232	2p23.2	16	cancer	Cervix	T892	Xu	2013	PLOS One	NGS	GPN1
830	17.222	17q22	16	cancer	Cervix	T9	Luft	2001	Int J Cancer	DIPS-PCR
831	23.225	Xq25	16	cancer	Cervix	T940	Xu	2013	PLOS One	NGS	DCAF12L2
832	11.1154	11p15.4	33	SCC	Cervix	T954	Kraus	2008	Cancer Res	APOT	MRVI1
833	14.2241	14q24.1	16	cancer	H&N	TCGA-BA-4077	Parfenov	2014	PNAS	NGS	RAD51B		68699686
834	10.2252	10q25.2	16	cancer	H&N	TCGA-BA-A41G	Koneva	2018	mol Cancer Res	RNA-seq	DUSP5
	23.1112	Xp11.22	16	cancer	H&N	TCGA-BA-A41G	Koneva	2018	Mol Cancer Res	RNA-seq	FGD1
	11.113	11p13	16	cancer	H&N	TCGA-BA-A41G	Koneva	2018	Mol Cancer Res	RNA-seq	RCN1
	14.2211	14q21.1	16	cancer	H&N	TCGA-BA-A41G	Koneva	2018	Mol Cancer Res	RNA-seq	TTC6
835	9.2311	9q31.1	16	cancer	H&N	TCGA-BA-A41H	Koneva	2018	Mol Cancer Res	RNA-seq	TEX10
836	11.1151	11p15.1	16	cancer	H&N	TCGA-BB-A6UM	Koneva	2018	mol Cancer Res	RNA-seq	OR7E14P
837	13.2221	13q22.1	16	cancer	H&N	TCGA-CN-4741	Koneva	2018	Mol Cancer Res	RNA-seq	KLF5
	11.2135	11q13.5	16	cancer	H&N	TCGA-CN-4741	Koneva	2018	Mol Cancer Res	RNA-seq	PRKRIR
	3.228	3q28	16	cancer	H&N	TCGA-CN-4741	Koneva	2018	Mol Cancer Res	RNA-seq	TP63	189239650
838	7.221	7q21	16	cancer	H&N	TCGA-CN-5374	Parfenov	2014	PNAS	NGS	MAGI2
839	3.12131	3p21.31	16	cancer	H&N	TCGA-CN-A499	Koneva	2018	Mol Cancer Res	RNA-seq	C3orf45
	11.2132	11q13.3	16	cancer	H&N	TCGA-CN-A499	Koneva	2018	mol Cancer Res	RNA-seq	FGFR3
	11.2131	11q13.1	16	cancer	H&N	TCGA-CN-A499	Koneva	2018	mol Cancer Res	RNA-seq	MALAT1
	11.2133	11q13.3	16	cancer	H&N	TCGA-CN-A499	Koneva	2018	Mol Cancer Res	RNA-seq	MYEOV
	12.1131	12p13.1	16	cancer	H&N	TCGA-CN-A499	Koneva	2018	mol Cancer Res	RNA-seq	RPL13AP20
	7.22111	7q21.11	16	cancer	H&N	TCGA-CN-A499	Koneva	2018	Mol Cancer Res	RNA-seq	SEMA3E
840	9.2312	9q31.2	16	cancer	H&N	TCGA-CN-A49C	Koneva	2018	mol Cancer Res	RNA-seq	ACTL7B
	11.2134	11q13.4	16	cancer	H&N	TCGA-CN-A49C	Koneva	2018	mol Cancer Res	RNA-seq	C2CD3	NADSYN1
	5.1141	5p14.1	16	cancer	H&N	TCGA-CN-A49C	Koneva	2018	Mol Cancer Res	RNA-seq	CDH9
	17.212	17q12	16	cancer	H&N	TCGA-CN-A49C	Koneva	2018	Mol Cancer Res	RNA-seq	ERBB2
	1.13621	1p36.21	16	cancer	H&N	TCGA-CN-A49C	Koneva	2018	Mol Cancer Res	RNA-seq	FLJ37453
	21.2211	21q21.1	16	cancer	H&N	TCGA-CN-A49C	Koneva	2018	Mol Cancer Res	RNA-seq	LINC0320
	4.2131	4q13.1	16	cancer	H&N	TCGA-CN-A49C	Koneva	2018	Mol Cancer Res	RNA-seq	LOC100144
	12.2213	12q21.31	16	cancer	H&N	TCGA-CN-A49C	Koneva	2018	mol Cancer Res	RNA-seq	TSPAN19
	1.13621	1p36.21	16	cancer	H&N	TCGA-CN-A49C	Koneva	2018	Mol Cancer Res	RNA-seq	UQCRHL
841	14.2241	14q24.1	16	cancer	H&N	TCGA-CN-A6V7	Koneva	2018	Mol Cancer Res	RNA-seq	RAD51B	intron 7	68683603
842	18.2213	18q21.33	16	cancer	H&N	TCGA-CQ-5323	Koneva	2018	Mol Cancer Res	RNA-seq	SERPINB3
843	11.1152	11p15.2	33	cancer	H&N	TCGA-CR-6471	Koneva	2018	Mol Cancer Res	RNA-seq	TEAD1
844	16.1132	16p13.2	16	cancer	H&N	TCGA-CR-6472	Parfenov	2014	PNAS	NGS	IFT140
845	1.22521	1q25.21	16	cancer	H&N	TCGA-CR-6473	Koneva	2018	Mol Cancer Res	RNA-seq	LOC100506023
	19.1131	19p13.11	16	cancer	H&N	TCGA-CR-6473	Koneva	2018	Mol Cancer Res	RNA-seq	NWD1
	1.22521	1q25.21	16	cancer	H&N	TCGA-CR-6473	Koneva	2018	Mol Cancer Res	RNA-seq	TNSFS4
846	15.2361	15q26.1	16	cancer	H&N	TCGA-CR-6481	Koneva	2018	Mol Cancer Res	RNA-seq	ANPEP
847	9.23411	9q34.11	16	cancer	H&N	TCGA-CR-6487	Koneva	2018	Mol Cancer Res	RNA-seq	CRAT
848	9.2312	9q31.2	16	cancer	H&N	TCGA-CR-7368	Koneva	2018	mol Cancer Res	RNA-seq	ACTL7B
849	13.2222	13q22.21	16	cancer	H&N	TCGA-CR-7369	Koneva	2018	Mol Cancer Res	RNA-seq	KLF12
850	21.2223	21q22.3	16	cancer	H&N	TCGA-CR-7385	Koneva	2018	Mol Cancer Res	RNA-seq	LINC00111
851	19.1132	19p13.2	16	cancer	H&N	TCGA-CV-5442	Koneva	2018	Mol Cancer Res	RNA-seq	OR1M1
	19.1132	19p13.3	16	cancer	H&N	TCGA-CV-5442	Koneva	2018	Mol Cancer Res	RNA-seq	OR7E24
852	9,124.1	9p24.1	16	cancer	H&N	TCGA-CV-5443	Parfenov	2014	PNAS	NGS	CD274
853	5.2143	5q14.3	16	cancer	H&N	TCGA-CV-5971	Koneva	2018	Mol Cancer Res	RNA-seq	NBPF22P
854	7.2213	7q21.3	33	cancer	H&N	TCGA-CV-6939	Koneva	2018	Mol Cancer Res	RNA-seq	LOC100506136
	7.2213	7q21.3	33	cancer	H&N	TCGA-CV-6939	Koneva	2018	Mol Cancer Res	RNA-seq	SLC25A13
855	21.2222	21q22.2	16	cancer	H&N	TCGA-CV-6961	Koneva	2018	Mol Cancer Res	RNA-seq	ETS2
856	13.2141	13q14.11	33	cancer	H&N	TCGA-CV-7100	Koneva	2018	mol Cancer Res	RNA-seq	EPSTI1
	3.2132	3q13.2	33	cancer	H&N	TCGA-CV-7100	Koneva	2018	Mol Cancer Res	RNA-seq	PHLDB2
	3.2132	3q13.2	33	cancer	H&N	TCGA-CV-7100	Koneva	2018	Mol Cancer Res	RNA-seq	PLCXD2
857	9.2312	9q31.2	16	cancer	H&N	TCGA-CV-7406	Koneva	2018	mol Cancer Res	RNA-seq	ACTL7B
858	17.212	17q12	35	cancer	H&N	TCGA-DQ-7591	Koneva	2018	Mol Cancer Res	RNA-seq	ACCN1
859	18.2211	18q21.1	16	cancer	H&N	TCGA-HD-7754	Koneva	2018	Mol Cancer Res	RNA-seq	CTIF
	18.221	18q21.1	16	cancer	H&N	TCGA-HD-7754	Koneva	2018	Mol Cancer Res	RNA-seq	ZBTB7C
860	21.2221	21q22.12	33	cancer	H&N	TCGA-HD-7832	Koneva	2018	Mol Cancer Res	RNA-seq	RUNX1
861	14.2112	14q11.2	35	cancer	H&N	TCGA-HD-8314	Koneva	2018	Mol Cancer Res	RNA-seq	C14orf167
862	2.2241	2q24.2	16	cancer	H&N	TCGA-HD-A634	Koneva	2018	Mol Cancer Res	RNA-seq	GPD2
	2.2241	2q24.1	16	cancer	H&N	TCGA-HD-A634	Koneva	2018	Mol Cancer Res	RNA-seq	NR4A2
863	9.1241	9p24.1	16	cancer	H&N	TCGA-HL-7533	Koneva	2018	Mol Cancer Res	RNA-seq	KIAA1432
	9.1241	9p24.1	16	cancer	H&N	TCGA-HL-7533	Koneva	2018	Mol Cancer Res	RNA-seq	PDCD1LG2
864	9.23411	9q34.12	35	cancer	H&N	TCGA-IQ-A61	Koneva	2018	Mol Cancer Res	RNA-seq	C9orf50
865	1.13621	1p36.21	16	cancer	H&N	TCGAKU-A6H7	Koneva	2018	Mol Cancer Res	RNA-seq	SLC25A34
	1.13621	1p36.21	16	cancer	H&N	TCGA-KU-A6H7	Koneva	2018	Mol Cancer Res	RNA-seq	FLJ37453
866	14.2211	14q21.1	16	cancer	H&N	TCGA-MZ-A619	Koneva	2018	Mol Cancer Res	RNA-seq	FOXA1
	14.2211	14q21.1	16	cancer	H&N	TCGA-MZ-A619	Koneva	2018	Mol Cancer Res	RNA-seq	TTC6
867	4.2311	4q31.1	16	cancer	H&N	TCGA-P3-A5Q3	Koneva	2018	Mol Cancer Res	RNA-seq	MAML3
868	14.2321	14q32.11	16	cancer	H&N	TCGA-P3-A5QF	Koneva	2018	Mol Cancer Res	RNA-seq	C14orf159
869	12.2213	12q21.33	16	cancer	H&N	TCGA-P3-A6SW	Koneva	2018	Mol Cancer Res	RNA-seq	C12orf37
870	17.2213	17q21.33	16	cancer	H&N	TCGA-P3-A6T6	Koneva	2018	Mol Cancer Res	RNA-seq	LOC400604
871	1.1223	1p22.3	16	cancer	H&N	TCGA-QK-A6IF	Koneva	2018	Mol Cancer Res	RNA-seq	PKN2
872	17.2232	17q23.2	16	cancer	H&N	TCGA-T2-A6X0	Koneva	2018	Mol Cancer Res	RNA-seq	BCAS3
	9.1241	9p24.1	16	cancer	H&N	TCGA-T2-A6X0	Koneva	2018	Mol Cancer Res	RNA-seq	CD274
	16.2132	13q13.2	16	cancer	H&N	TCGA-T2-A6X0	Koneva	2018	mol Cancer Res	RNA-seq	NBEA
873	3.22633	3q26.33	33	cancer	H&N	TCGA-TN-A7H1	Koneva	2018	Mol Cancer Res	RNA-seq	FLJ46066
874	21.2223	21q22.4	16	cancer	H&N	TCGA-VN-A6V1	Koneva	2018	Mol Cancer Res	RNA-seq	LINC00162
875	1.2233	1q23.3	16	cancer	H&N	UM-P02	Koneva	2018	Mol Cancer Res	RNA-seq	PBX1
876	11.2222	11q22.2	16	cancer	H&N	UM-P03	Koneva	2018	Mol Cancer Res	RNA-seq	BIRC3
877	6.1221	6p22.1	16	cancer	H&N	UM-P06	Koneva	2018	Mol Cancer Res	RNA-seq	HIST1H1D
878	1.2313	1q31.3	18	cancer	H&N	UM-P08	Koneva	2018	Mol Cancer Res	RNA-seq	KCNT2
879	3.12131	3p21.31	33	cancer	H&N	UM-P12	Koneva	2018	Mol Cancer Res	RNA-seq	WDR6
880	3.1143	3p14.3	16	cancer	H&N	UM-P14	Koneva	2018	Mol Cancer Res	RNA-seq	IL17RD
881	8.1232	8p23.2	16	cancer	H&N	UM-P15	Koneva	2018	Mol Cancer Res	RNA-seq	CSMD1
882	17.1132	17p13.2	16	cancer	H&N	UM-P15	Koneva	2018	Mol Cancer Res	RNA-seq	GLTPD2
883	11.1155	11p15.5	16	cancer	H&N	UM-P16	Koneva	2018	Mol Cancer Res	RNA-seq	mir4298
884	6.2233	6q23.3	16	cancer	H&N	UM-P17	Koneva	2018	Mol Cancer Res	RNA-seq	CTGF
	13.2221	13q22.1	16	cancer	H&N	UM-P17	Koneva	2018	Mol Cancer Res	RNA-seq	KLF12
	14.2212	14q21.2	16	cancer	H&N	UM-P17	Koneva	2018	mol Cancer Res	RNA-seq	MIS18BP1
885	3.228	3q28	16	SCC	H&N	UM-SCC-047	Olthof	2015	Int J Cancer	DIPS	TP63	189567310	189567310
886	6.121	6p21	16	Cell line	H&N	UPCI:SCC090	Ragin	2004	Int J Cancer	RS-PCR
887	9.2311	9q31.1	16	Cell line	H&N	UPCI:SCC090	Ragin	2004	Int J Cancer	RS-PCR
888	5.114	5p14	33	Cell line	Cervix	UT-DEC-1	Peitsaro	2002	J Clin Microbiol	RT-PCR
889	12.1112	12p11.2	18	SCC	Cervix	V144	Kraus	2008	Cancer Res	APOT	SSPN
890	6.1221	6p22.1	18	CIN3	Cervix	V204	Kraus	2008	Cancer Res	APOT	chr6_368.1
891	20.2132	20q13.2	45	CIN3	Cervix	V815	Kraus	2008	Cancer Res	APOT	NT_011362.413
892	7.113	7p13	45	CIN3	Cervix	V828/1	Kraus	2008	Cancer Res	APOT
893	23.1223	Xp22.31	18	CIN3	Cervix	V863	Kraus	2008	Cancer Res	APOT
894	4,234.3	4q34.3	16	cancer	Cervix	ZLR-01	Zhou	2022	Nature Communication	NGS	LINC00290
895	11,231.1	11q31.1	16	cancer	Cervix	ZLR-02	Zhou	2022	Nature Communication	NGS	CAPN1
896	10.2243	10q24.32	16	cancer	Cervix	ZLR-03	Zhou	2022	Nature Communication	NGS	GBF1
897	20.1121	20p12.1	16	cancer	Cervix	ZLR-04	Zhou	2022	Nature Communication	NGS	MACROD2
898	9.22113	9q21.13	16	cancer	Cervix	ZLR-06	Zhou	2022	Nature Communication	NGS	ALH1A1
	4.22121	4q21.21	16	cancer	Cervix	ZLR-06	Zhou	2022	Nature Communication	NGS	FGF5
	1.133	1p33	16	cancer	Cervix	ZLR-06	Zhou	2022	Nature Communication	NGS	FOXD2	TRABD2B
	3.2223	3q22.3	16	cancer	Cervix	ZLR-06	Zhou	2022	Nature Communication	NGS	IL20RB
	8.21121	8q11.21	16	cancer	Cervix	ZLR-06	Zhou	2022	Nature Communication	NGS	SNAI2
	2.222	2q22	16	cancer	Cervix	ZLR-06	Zhou	2022	Nature Communication	NGS	TEX41	PABPC1P2
	9.22113	9q21.13	16	cancer	Cervix	ZLR-06	Zhou	2022	Nature Communication	NGS	TMC1
899	19.2134	19q13.42	16	cancer	Cervix	ZLR-08	Zhou	2022	Nature Communication	NGS	CDC42EP5
	19.2134	19q13.42	16	cancer	Cervix	ZLR-08	Zhou	2022	Nature Communication	NGS	LENG9
900	4.23121	4q31.21	16	cancer	Cervix	ZLR-09	Zhou	2022	Nature Communication	NGS	INPP4B	IL15
901	10.2223	10q22.3	16	cancer	Cervix	ZLR-10	Zhou	2022	Nature Communication	NGS	DLG5-AS1	POLR3A
902	8.22421	8q24.21	16	cancer	Cervix	ZLR11	Zhou	2022	Nature Communication	NGS	CASC21 CASC8
903	13.2221	13q22.1	16	cancer	Cervix	ZLR-13	Zhou	2022	Nature Communication	NGS	KLF5
904	13.2221	13q22.1	16	cancer	Cervix	ZLR-14	Zhou	2022	Nature Communication	NGS	KLF5
	14.2321	14q32.11	16	cancer	Cervix	ZLR-14	Zhou	2022	Nature Communication	NGS	RPS6KA5
905	17.2231	17q23.1	16	cancer	Cervix	ZLR-17	Zhou	2022	Nature Communication	NGS	CLTC
	17.2231	17q23.1	16	cancer	Cervix	ZLR-17	Zhou	2022	Nature Communication	NGS	VMP1
906	2.124	2p24	45	cancer	Cervix	IC4T	Sastre	2000	J Gen Virol	DIPS	MYCN
907	13.2221	13q22.1	56	cancer	H&N	R315	Mainguené	2022	Mol Oncol	NGS	KLF5
908	13.2222	13q22.2	16	SCC	H&N	H474101A	Khoury	2013	J Virol	NGS	KLF5	KLF12
909	10.1151	10p15.1	45	cancer	Cervix	SGCX-NOR-002	Ojesina	2014	Nature	RNA-seq	LINC00704
910	9.232	9q32	16	cancer	Cervix	SGCX-NOR-003	Ojesina	2014	Nature	RNA-seq	SNX30
911	9.22231	9q22.31	18	cancer	Cervix	SGCX-NOR-076	Ojesina	2014	Nature	RNA-seq	C9orf3	FANCC
912	17.2231	17q23.1	18	cancer	Cervix	SGCX-NOR-005	Ojesina	2014	Nature	RNA-seq	TUBD1	RPS6KB1
913	6.221	6q21	52	cancer	Cervix	SGCX-NOR-006	Ojesina	2014	Nature	RNA-seq
914	1.2323	1q32.3	16	cancer	Cervix	SGCX-NOR-008	Ojesina	2014	Nature	RNA-seq	PROX1
	23.1114	Xp11.4	16	cancer	Cervix	SGCX-NOR-008	Ojesina	2014	Nature	RNA-seq	USP9X
915	8.22421	8q24.21	18	cancer	Cervix	SGCX-NOR-011	Ojesina	2014	Nature	RNA-seq	MYC		128,742,967	128,806,935
916	8.11123	8p11.23	18	cancer	Cervix	SGCX-NOR-012	Ojesina	2014	Nature	RNA-seq
917	8.22421	8q24.21	18	cancer	Cervix	SGCX-NOR-013	Ojesina	2014	Nature	RNA-seq	LOC727677
918	17.2212	17q21.2	18	cancer	Cervix	SGCX-NOR-015	Ojesina	2014	Nature	RNA-seq	KRT39
919	9.22231	9q22.31	18	cancer	Cervix	SGCX-NOR-020	Ojesina	2014	Nature	RNA-seq	C9orf3
920	14.2241	14q24.1	18	cancer	Cervix	SGCX-NOR-021	Ojesina	2014	Nature	RNA-seq	RAD51B		68592064	68667626
921	12.1112	12p11.22	45	cancer	Cervix	SGCX-NOR-023	Ojesina	2014	Nature	RNA-seq	PTHLH
922	2.2142	2q14.2	16	cancer	Cervix	SGCX-NOR-024	Ojesina	2014	Nature	RNA-seq	GLI2
923	19.2132	19q13.2	16	cancer	Cervix	SGCX-NOR-029	Ojesina	2014	Nature	RNA-seq	CEACAM5	42224737	42233185
924	3.2262	3q26.2	16	cancer	Cervix	SGCX-NOR-030	Ojesina	2014	Nature	RNA-seq	TNIK
925	9.23411	9q34.11	16	cancer	Cervix	SGCX-NOR-037	Ojesina	2014	Nature	RNA-seq	LINC00963
	17.2212	17q21.2	16	cancer	Cervix	SGCX-NOR-037	Ojesina	2014	Nature	RNA-seq	RARA
926	16.1131	16p13.12	16	cancer	Cervix	SGCX-NOR-043	Ojesina	2014	Nature	RNA-seq	PARN	PLA2G10
	17.212	17q12	16	cancer	Cervix	SGCX-NOR-043	Ojesina	2014	Nature	RNA-seq	ERBB2	PGAP3	STARD3
	17.2253	17q25.3	16	cancer	Cervix	SGCX-NOR-043	Ojesina	2014	Nature	RNA-seq	P4HB
927	22.2133	22q13.31	31	cancer	Cervix	SGCX-NOR-044	Ojesina	2014	Nature	RNA-seq	MIRLET7BHG
928	13.2213	13q21.33	16	cancer	Cervix	SGCX-NOR-045	Ojesina	2014	Nature	RNA-seq	DACH1
929	7.2361	7q36.1	18	cancer	Cervix	SGCX-NOR-046	Ojesina	2014	Nature	RNA-seq
930	7.113	7p13	16	cancer	Cervix	SGCX-NOR-048	Ojesina	2014	Nature	RNA-seq	BLVRA	COA1
931	12.222	12q22	18	cancer	Cervix	SGCX-NOR-050	Ojesina	2014	Nature	RNA-seq	TMCC3
932	20.212	20q12	16	cancer	Cervix	SGCX-NOR-052	Ojesina	2014	Nature	RNA-seq	PTRT
	23.1223	Xp22.31	16	cancer	Cervix	SGCX-NOR-052	Ojesina	2014	Nature	RNA-seq
933	3.1251	3p25.1	45	cancer	Cervix	SGCX-NOR-058	Ojesina	2014	Nature	RNA-seq
934	14.2212	14q21;2	18	cancer	Cervix	SGCX-NOR-059	Ojesina	2014	Nature	RNA-seq	KLHL28	FAM179B
935	1.1343	1p34.3	18	cancer	Cervix	SGCX-NOR-064	Ojesina	2014	Nature	RNA-seq	SNIP1
936	3.2252	3q25.2	18	cancer	Cervix	SGCX-NOR-066	Ojesina	2014	Nature	RNA-seq	RAP2B
937	3.2252	3q25.2	18	cancer	Cervix	SGCX-NOR-068	Ojesina	2014	Nature	RNA-seq
938	3.2252	3q25.2	18	cancer	Cervix	SGCX-NOR-069	Ojesina	2014	Nature	RNA-seq
939	3.2252	3q25.2	18	cancer	Cervix	SGCX-NOR-070	Ojesina	2014	Nature	RNA-seq
	18.2213	18q21.33	56	cancer	Cervix	SGCX-NOR-070	Ojesina	2014	Nature	RNA-seq	SERPINB3	SERPINB4
940	9.2343	9q34.3	18	cancer	Cervix	SGCX-NOR-072	Ojesina	2014	Nature	RNA-seq	EGFL7
	14.2241	14q24.1	16	cancer	Cervix	SGCX-NOR-072	Ojesina	2014	Nature	RNA-seq	RAD51B		68596826	68607359
941	2.2241	2q24.1	16	cancer	Cervix	SGCX-NOR-074	Ojesina	2014	Nature	RNA-seq	NR4A2
942	8.2243	8q24.3	18	cancer	Cervix	SGCX-NOR-075	Ojesina	2014	Nature	RNA-seq	MAFA
943	9.22231	9q22.31	18	cancer	Cervix	SGCX-NOR-076	Ojesina	2014	Nature	RNA-seq	C9orf3	FANCC
	17.212	17q12	16	cancer	Cervix	SGCX-NOR-076	Ojesina	2014	Nature	RNA-seq	ERBB2	GRB7
944	2.2223	2q22.3	31	cancer	Cervix	SGCX-NOR-077	Ojesina	2014	Nature	RNA-seq
945	1.2323	1q32.3	16	cancer	Cervix	SGCX-NOR-078	Ojesina	2014	Nature	RNA-seq	PROX1
	14.2241	14q24.1	52	cancer	Cervix	SGCX-NOR-078	Ojesina	2014	Nature	RNA-seq	RAD51B		68986041	69029256
946	1.244	1q44	16	cancer	Cervix	SGCX-NOR-080	Ojesina	2014	Nature	RNA-seq
947	3.228	3q28	56	cancer	Cervix	SGCX-NOR-082	Ojesina	2014	Nature	RNA-seq	TP63	189597860
948	22,211.21	22q11.21	33	cancer	Cervix	SGCX-NOR-083	Ojesina	2014	Nature	RNA-seq	BCL2L13
949	3.22632	3q26.32	16	cancer	Cervix	SGCX-NOR-086	Ojesina	2014	Nature	RNA-seq
950	2.2223	2q22.3	16	cancer	Cervix	SGCX-NOR-087	Ojesina	2014	Nature	RNA-seq
951	20.112	20p12	18	cancer	Cervix	SGCX-NOR-088	Ojesina	2014	Nature	RNA-seq	MACROD2	15025585	15067827
952	1.2243	1q24.3	18	cancer	Cervix	SGCX-NOR-089	Ojesina	2014	Nature	RNA-seq	FMO3
	8.2243	8q24.3	16	cancer	Cervix	SGCX-NOR-089	Ojesina	2014	Nature	RNA-seq	EIF2C2
953	2.2223	2q22.3	18	cancer	Cervix	SGCX-NOR-090	Ojesina	2014	Nature	RNA-seq
954	7.1211	7p21.1	45	cancer	Cervix	SGCX-NOR-091	Ojesina	2014	Nature	RNA-seq
955	2.2223	2q22.3	16	cancer	Cervix	SGCX-NOR-092	Ojesina	2014	Nature	RNA-seq
956	2.114	2p14	16	cancer	Cervix	SGCX-NOR-094	Ojesina	2014	Nature	RNA-seq
957	12.2213	12q21.33	16	cancer	Cervix	SGCX-NOR-095	Ojesina	2014	Nature	RNA-seq	POC1B
958	19.2132	19q13.2	16	cancer	Cervix	SGCX-NOR-096	Ojesina	2014	Nature	RNA-seq	CEACAM5	42215341	42223935
959	4.2222	4q22.2	16	cancer	Cervix	SGCX-NOR-097	Ojesina	2014	Nature	RNA-seq
	8.2243	8q24.3	16	cancer	Cervix	SGCX-NOR-097	Ojesina	2014	Nature	RNA-seq	EIF2C2
960	3.1142	3p14.2	16	cancer	Cervix	SGCX-NIR-098	Ojesina	2014	Nature	RNA-seq
961	8.22421	8q24.21	18	cancer	Cervix	SGCX-NOR-102	Ojesina	2014	Nature	RNA-seq
962	14.2322	14q32.2	16	cancer	Cervix	SGCX-NOR-103	Ojesina	2014	Nature	RNA-seq	BCL11B
963	10.2253	10q25.3	18	cancer	Cervix		Zapatka	2018	bioRxiv	NGS	ABLIM1
964	9.2313	9q31.3	16	SCC	H&N		Khoury	2013	J Virol	NGS	ACTL7B
965	9.2313	9q31.3	16	SCC	H&N		Khoury	2013	J Virol	NGS	ACTL7B
966	10.1151	10p15.1	6	Papillomatosis	H&N		Huebbers	2013	PLOS One	APOT	AKR1C3
967	15.2261	15q26.1	16	SCC	H&N		Khoury	2013	J Virol	NGS	ANPEP
968	18.2213	18q21.31	16	cancer	Cervix		Nambaru	2009	APJCP	APOT	ATP8B1
969	17.221	17q21	16	cancer	Cervix		Nambaru	2009	APJCP	APOT	BRCA1
970	1.13622	1p36.22	18	cancer	Cervix		Zapatka	2018	bioRxiv	NGS	CASZ1
971	17.212	17q12	16	cancer	Cervix		Nambaru	2009	APJCP	APOT	C-CR7
972	9.1241	9p24.1	16	SCC	H&N		Khoury	2013	J Virol	NGS	CD274
973	9.1241	9p24.1	35	cancer	H&N		Mainguené	2022	Mol Oncol	NGS	CD274
974	9.1241	9p24.1	35	cancer	H&N		Mainguené	2022	Mol Oncol	NGS	CD274
975	9.1241	9p24.1	35	cancer	H&N		Mainguené	2022	Mol Oncol	NGS	CD274
976	9.23411	9q34.11	16	cancer	Cervix		Zapatka	2018	bioRxiv	NGS	CRAT
977	9.23411	9q34.11	16	SCC	H&N		Khoury	2013	J Virol	NGS	CRAT
978	5.232	5q32	16	cancer	Cervix		Nambaru	2009	APJCP	APOT	CSK1A1
979	18.2211	18q21.1	16	SCC	H&N		Khoury	2013	J Virol	NGS	CTIF
980	17.2213	17q21.31	16	cancer	Cervix		Zapatka	2018	bioRxiv	NGS	ERBB2		erreur de loc chr?
981	21.2222	21q22.2		cancer	Cervix		Zapatka	2018	bioRxiv	NGS	ETS2				3 cas
982	4.225	4q25	16	cancer	Anus		Harlé	2019	BMC Cancer	NGS	FAM241A
983	3.228	3q28	16	cancer	Cervix		Nambaru	2009	APJCP	APOT	FAM79B
984	7.1221	7p22.1	18	cancer	Cervix		Nambaru	2009	APJCP	APOT	FOX K1
985	23.1222	Xp22.2	16	cancer	Cervix		Zapatka	2018	bioRxiv	NGS	FRMPD4
986	1.2212	1q21.2	16	cancer	Cervix		Nambaru	2009	APJCP	APOT	GOLPH3L
987	8.2243	8q24.3	18	cancer	Cervix		Nambaru	2009	APJCP	APOT	GPAA1
988	16.1133	16p13.3	16	SCC	H&N		Khoury	2013	J Virol	NGS	IFT140
989	21.2223	21q22.3	16	cancer	Cervix		Zapatka	2018	bioRxiv	NGS	LINC00111				3 cas
990	21.2223	21q22.3	16	SCC	H&N		Khoury	2013	J Virol	NGS	LINC00111
991	7.2323	7q32.3	18	cancer	Cervix		Zapatka	2018	bioRxiv	NGS	LINC-PINT
992	15.2263	15q26.3	16	cancer	Cervix		Nambaru	2009	APJCP	APOT	LRRC28
993	7.22111	7q21.11	16	cancer	Cervix		Zapatka	2018	bioRxiv	NGS	MAGI2
994	23.228	Xq28	16	cancer	Cervix		Zapatka	2018	bioRxiv	NGS	MAMLD1
995	11.113	11p13	16	cancer	Cervix		Nambaru	2009	APJCP	APOT	MPPED2
996	5.2143	5q14.3	16	SCC	H&N		Khoury	2013	J Virol	NGS	NBPF22P
997	1.243	1q43	16	cancer	Cervix		Nambaru	2009	APJCP	APOT	NID1
998	2.2241	2q24.1	18	cancer	Cervix		Zapatka	2018	bioRxiv	NGS	NR4A2
999	19.1132	19p13.2	16	SCC	H&N		Khoury	2013	J Virol	NGS	OR1M1
1000	17.2112	17q11.2	16	cancer	Cervix		Nambaru	2009	APJCP	APOT	PHF12
1001	3.2132	3q13.2	18	cancer	Cervix		Zapatka	2018	bioRxiv	NGS	PHLDB2
1002	6.1122	6p12.2	16	cancer	Cervix		Nambaru	2006	APJCP	APOT	PKHD1
1003	9.1241	9p24.1		cancer	Cervix		Zapatka	2018	bioRxiv	NGS	PLGRKT				4 cas
1004	9.1241	9p24.1	33	cancer	H&N		Mainguené	2022	Mol Oncol	NGS	PLGRKT
1005	9.1241	9p24.1	33	cancer	H&N		Mainguené	2022	Mol Oncol	NGS	PLGRKT
1006	9.1241	9p24.1	33	cancer	H&N		Mainguené	2022	Mol Oncol	NGS	PLGRKT
1007	8.22421	8q24.21	16	cancer	Cervix		Zapatka	2018	bioRxiv	NGS	PVT1					9 cas
1008	14.2241	14q24.1	16	SCC	H&N		Khoury	2013	J Virol	NGS	RAD51B	intron 7	68699906	68741641
1009	7.2362	7q36.2	18	cancer	Cervix		Nambaru	2009	APJCP	APOT	RHEB
1010	18.2213	18q21.33	16	SCC	H&N		Khoury	2013	J Virol	NGS	SERPINB3
1011	10.2243	10q24.33	18	cancer	Cervix		Nambaru	2009	APJCP	APOT	SH3PXD2A
1012	10.2243	10q24.33	18	cancer	Cervix		Nambaru	2009	APJCP	APOT	SH3PXD2A
1013	23.1113	Xp11.3	16	cancer	Cervix		Zapatka	2018	bioRxiv	NGS	SLC9A7
1014	20.2133	20q13.32	16	cancer	Cervix		Nambaru	2009	APJCP	APOT	SLC9A8
1015	9,231.1	9q31.1	16	cancer	Cervix		Zapatka	2018	bioRxiv	NGS	STX17
1016	11.1155	11p15.5	18	cancer	Cervix		Zapatka	2018	bioRxiv	NGS	TALDO1		4 cas
1017	1.1313	1p31.3	16	SCC	H&N		Khoury	2013	J Virol	NGS	TCTEX1D1
1018	9.2311	9q31.1	16	cancer	Cervix		Zapatka	2018	bioRxiv	NGS	TEX10				3 cas
1019	15.223	15q23	16	cancer	Cervix		Nambaru	2009	APJCP	APOT	THSD4
1020	12.222	12q22.2	18	cancer	Cervix		Nambaru	2009	APJCP	APOT	TMCC3
1021	1.2251	1q25.1	16	SCC	H&N		Khoury	2013	J Virol	NGS	TNFSF4
1022	3.228	3q28	16	cancer	Cervix		Nambaru	2009	APJCP	APOT	TP63	ND
1023	3.228	3q28	16	cancer	Cervix		Zapatka	2018	bioRxiv	NGS	TP63	ND
1024	17.2231	17q23.1	16	cancer	Cervix		Nambaru	2009	APJCP	APOT	TUBD1
1025	18.221	18q21.1	16	SCC	H&N		Khoury	2013	J Virol	NGS	ZBTB7C
1026	3.1141	3p14.1	16	cancer	Cervix		Thorland	2003	Oncogene	RS-PCR
1027	5.1153	5p15.3	16	cancer	Cervix		Thorland	2003	Oncogene	RS-PCR
1028	6.1251	6p25.1	18	SCC	Cervix		Liang	2014	Int J Gynecol Res	NGS
1029	7.231	7q31	18	cancer	Cervix		Ferber	2003	Oncogene	RS-PCR
1030	11.1155	11p15.5	16	cancer	Cervix		Thorland	2003	Oncogene	RS-PCR
1031	12.2213	12q21.31	16	cancer	Cervix		Thorland	2003	Oncogene	RS-PCR
