# Supplementary material for: HPV DNA Integration at Actionable Cancer-Related Genes Loci in HPV-Associated Carcinomas
Source: Cancers (Basel). 2024 Apr 20;16(8):1584. doi: 10.3390/cancers16081584 (PMC11048798; doi:10.3390/cancers16081584)
Supplement: Supplementary file 1 [file cancers-16-01584-s001.zip › File SF3 Recurrent targets per HPV & locasization.xlsx]

## Sheet: Feuil1
	Chromosomal site	Target gene	Nb	Cervix		HNCC		Anus		Vulva		HPV16	HPV18/45	Others
				n=811		n=164		n=32		n=16		n=690	n=232	n=111
3.228	3q28	TP63	22	14		6				2		16	2	4
13.2221	13q22.1	KLF5/KLF12	21	16		6						16	4	1
20.1121	20p12.1	MACROD2	15	13		2						12	3
8.22421	8q24.21	MYC	13	12						1		7	6
17.2231	17q23.1	VMP1	12	12								6	6
14.2241	14q24.1	RAD51B	12	8		3		1				6	4	2
19.2132	19q13.2	CEACAM5/6/7	10	10								6	4
8.22421	8q24.21	PVT1	8	4		3		1				8
9.1241	9p24.1	CD274	8			7		1				4		4
3.1142	3p14.2	FHIT	7	7								3	3	1
19.1132	19p13.2	NFIX	7	2				5				6	1
9.2232	9q22.32	C9orf3	7	7								4	3
14.2211	14q21.1	MIPOL1/TTC6	6	6								5	1
2.2221	2q22.1	LRP1B	6	6								2	4
9.1241	9p24.1	PLGRKT	6	2		4						1		4
9.2312	9q31.2	ACTL7B	6			6						5		1
17.212	17q12	ERBB2	6	5		1						6
8.22421	8q24.21	CASC21/CASC8	5	5								2	3
17.2231	17q23.1	TUBD1	5	4		1						3	2
14.2322	14q32.2	BCL11B	5	4				1				5
1.1313	1p31.3	NFIA	4	3		1						2		2
3.22631	3q26.31	NAALADL2	4	4								2	2
3.228	3q28	LEPREL1	4	4								2	1	1
4.2133	4q13.3	IL8	4	4								2	1	1
7.22111	7q21.11	MAGI2	4	2		2						4
9.2223	9q22.3	FANCC	4	2		2						3	1
2.2241	2q24.1	NR4A2	4	3		1						3	1
2.2221	2q22.1	CCDC148	3					1		2		3
3.2262	3q26.2	MECOM	3	3								3
4.2213	4q21.3	MAPK10	3	3								1	1	1
4.22131	4q21.31	INPP4B	3	3								1	2
6.2232	6q23.2	SGK1	3	2		1						2		1
7.2311	7q31.1	IMMP2L	3	2		1						1	1	1
9.1214	9p21.4	PDCD1LG2	3	1		2						3
9.23411	9q34.11	CRAT	3	1		2						3
10.1151	10p15.1	AKR1C3	3	2		1						2		1
13.2142	13q14.2	RB1	3	1		1						2		1
14.2211	14q21.1	FOXA1	3	2		1						2		1
15.2214	15q21.4	LIPC	3	3								2		1
18.2211	18q21.1	ZBTB7C	3	1		2						3
20.2112	20q11.21	COX412	3	3								3
21.2223	21q22.3	LINC00111	3	1		2						3
3.228	3q28	TPRG1	3	3								3
1.13621	1p36.21	FLJ37453	2									2
1.13622	1p36.22	CASZ1	2	2								1	1
1.13633	1p36.33	LOC100652939	2									2
1.2323	1q32.3	PROX1	2									2
1.241	1q41	SUSD4	2									2
1.244	1q44	SMYD3	2									1		1
2.115	2p15	MDH1	2									2
2.115	2p15	WDPCP	2									1	1
2.2142	2q14.2	GLI2	2									2
2.2223	2q22.3	TEX41	2	1				1				2
2.2241	2q24.1	GPD2	2									2
2.2312	2q31.2	NFE2L2	2									2
2.2332	2q33.2	PARD3B	2	2								2
2.2363	2q36.3	COL4A4	2									1	1
2.2371	2q37.1	DGKD	2									1	1
3.1121	3p12.1	CADM2	2									1		1
3.1253	3p25.3	HRH1	2									1	1
3.1262	3p26.2	GRM7	2									1		1
3.2132	3q13.2	PHLDB2	2										1	1
3.2223	3q22.3	IL20RB	2									2
3.223	3q23	SLC25A36	2									2
3.22631	3q26.31	NLGN1	2									1	1
4.1163	4p16.3	FGFR3	2									2
4.2133	4q13.3	MTHFD2L	2									1	1
4.2213	4q21.3	SLC10A6	2									2		1
4.2313	4q31.3	LRBA	2									1		1
5.11533	5p15.33	TERT	2	2								1	1
5.2123	5q12.3	MAST4	2	2								1		1
5.2143	5q14.3	NBPF22P	2									2		1
5.2311	5q31.1	C5Orf66	2									1		1
6.1253	6p25.2	SERPINB9	2									2
6.22231	6q22.31	COrf170	2									2
6.22232	6q22.32	CENPW	2									2
7.1143	7p14.3	AVL9	2									2
7.1151	7p15.1	CREB5	2									2
7.1211	7p21.1	AHR	2									1	1
7.2323	7q32.3	LINC-PINT	2									1	1
7.2323	7q32.3	MKLN1	2	1						1		2
7.2361	7q36.1	KMT2C	2									2
7.2362	7q36.2	DPP6	2									2
8.1232	8p23.2	CSMD1	2									2
8.21121	8q11.21	SPIDR	2	2									2
8.2121	8q12.1	LYN	2									2
8.2222	8q22.2	VPS13B	2									2
8.2243	8q24.3	MROH5	2									2
8.2243	8q24.3	EIF2C2	2									2
9.1241	9p24.1	KIAA1432	2									2
9.22113	9q21.13	ALDH1A1	2									2
9.2311	9q31.1	TEX10	2									2
9.2333	9q33.3	NR5A1	2	2								2
10.2233	10q23.31	PTEN	2									2
10.2243	10q24.33	SH3PXD2A	2										2
10.2253	10q25.3	ATRNL1	2									2
11.2131	11q13.1	DRAP1	2									2
11.2222	11q22.2	MMP12	2	2								1	1
12.1121	12p12.1	SSPN	2	2									1	1
12.222	12q22	TMCC3	2										2
13.2213	13q21.32	PCDH9	2	2								1	1
14.2212	14q21.2	MIS18BP1	2									2
14.2231	14q23.1	PRKCH	2										1	1
15.2213	15q21.3	ALDH1A2	2									1	1
15.2223	15q22.31	RAB11A	2	2									2
15.2242	15q24.2	ETFA	2									2
15.261	15q26.1	ANPEP	2									2
16.1121	16p12.1	GSG1L	2									1		1
16.1132	16p13.2	IFT140	2									2
16.1133	16p13.3	TRAP1	2									2
16.1133	16p13.3	CREBBP	2									2
17.212	17q12	PGAP3	2									2
18.2211	18q21.1	CTIF	2									2
18.2213	18q21.31	ATP8B1	2									2
18.2213	18q21.33	RNF152	2									1		1
18.2213	18q21.33	SERPINB3	2									2
19.2133	19q13.33	RPL13A	2											2
19.2134	19q13.42	EPN1	2											2
20.2132	20q13.2	TSHZ2	2									2
21.2222	21q22.2	ETS2	2									1
22.2111	22q11.1	CECR1	2									2
23.1222	Xp22.2	MID1	2									1		1
23.1223	Xp22.31	STS	2									2
23.2213	Xq21.33	DIAPH2	2									2
